1       **Arousal dependent modulation of thalamo-cortical functional**  
2                                                                   **interaction**

3       **Iain Stitt<sup>1</sup>, Zhe Charles Zhou<sup>1,2</sup>, Susanne Radtke-Schuller<sup>1</sup>, Flavio Fröhlich<sup>1,2,3,4,5,6</sup>**

4       <sup>1</sup> Department of Psychiatry, University of North Carolina at Chapel Hill, Chapel Hill, NC 27599,  
5       USA

6       <sup>2</sup> Neurobiology Curriculum, University of North Carolina at Chapel Hill, Chapel Hill, NC 27599,  
7       USA

8       <sup>3</sup> Department of Neurology, University of North Carolina at Chapel Hill, Chapel Hill, NC 27599,  
9       USA

10      <sup>4</sup> Department of Cell Biology and Physiology, University of North Carolina at Chapel Hill,  
11      Chapel Hill, NC 27599, USA

12      <sup>5</sup> Department of Biomedical Engineering, University of North Carolina at Chapel Hill, Chapel  
13      Hill, NC 27599, USA

14      <sup>6</sup> Neuroscience Center, University of North Carolina at Chapel Hill, Chapel Hill, NC 27599,  
15      USA

16

17

18 **Summary paragraph:**

19 Cognition and behavior emerge from the dynamic interaction of widely distributed, but  
20 functionally specialized brain networks. However, it remains unclear how network-level  
21 interactions dynamically reorganize to support ever-shifting cognitive and behavioral demands.  
22 Here, we investigate how the interaction between posterior parietal cortex (PPC) and lateral  
23 posterior (LP) / Pulvinar is shaped by ongoing fluctuations in pupil-linked arousal, which is a non-  
24 invasive measure related to neuromodulatory tone in the brain. We found that fluctuations in pupil-  
25 linked arousal tracked the dynamic interaction between PPC and LP/Pulvinar characterized by  
26 changes in the direction and carrier frequency of oscillatory interaction. Active visual exploration  
27 by saccadic eye movements elicited similar transitions in thalamo-cortical interaction. These  
28 findings suggest a common network substrate of both spontaneous activity and active vision. Thus,  
29 neuromodulators may play a role in dynamically sculpting the patterns of thalamo-cortical  
30 functional interaction that underlie visual processing.

31

## 32 **Introduction:**

33 As exemplified by the daydreaming student drifting in and out of focus during class, the brain  
34 exhibits the ability to rapidly transition between states of varying engagement with the external  
35 world. Rather than resulting from changes in anatomical connections between neurons, such  
36 moment-to-moment variability in internal brain state arises through changes in network-level  
37 activity patterns occurring within the brain's structural framework (Deco et al., 2011). In this  
38 scheme, cognition and behavior emerge from the dynamic interaction of widely distributed, but  
39 functionally specialized cortical and subcortical brain regions (Koch et al., 2016; Siegel et al.,  
40 2012).

41 In the visual system, higher order brain structures such as the lateral posterior (LP) / Pulvinar  
42 nuclear complex of the thalamus play an essential role in orchestrating the patterns of large-scale  
43 cortical interaction that underlie visual behavior (Jones, 2001; Saalman and Kastner, 2011;  
44 Saalman et al., 2012). Providing the structural framework for this coordinating role, LP/Pulvinar  
45 exhibits reciprocal anatomical connectivity with widely distributed visual cortical areas (Jones,  
46 2001). In particular, poster parietal cortex (PPC), a higher-order association area that itself is a hub  
47 of sensory integration, sends dense projections to PL/Pulvinar (Manger et al., 2002). Converging  
48 evidence suggests that the selective synchronization of neuronal oscillations between LP/Pulvinar  
49 and cortex facilitates communication between inter-connected cortical sites, and that such patterns  
50 of thalamo-cortical dynamics reflect the circuit-level computations that underlie visual sensory  
51 processing and behavior (Fries, 2015; Siegel et al., 2012). Yet, despite the established importance  
52 of thalamo-cortical interaction for visual processing and behavior (Saalman and Kastner, 2011;  
53 Saalman et al., 2012), we still lack a clear understanding of how the relative strength of thalamus-  
54 to-cortex and cortex-to-thalamus signals are dynamically tuned to meet current behavioral  
55 demands.

56 Recent theoretical work proposed neuromodulators as a mechanism for modifying information  
57 flow in neuronal networks on a short temporal scale (Heeger, 2017). Indeed, the neuromodulators  
58 noradrenaline and acetylcholine modulate the intrinsic properties of neurons across both cortical  
59 and thalamic areas (McCormick, 1989; McCormick et al., 1993; Pape and McCormick, 1989;  
60 Polack et al., 2013; Rogawski and Aghajanian, 1980; Zaghera and McCormick, 2014). Beyond the  
61 effects of such neurotransmitters on the local cellular level in cortex and thalamus, it remains

62 unclear if neuromodulators help to shape emergent patterns of information routing in thalamo-  
63 cortical networks. Recent findings have linked ongoing fluctuations in pupil diameter to the release  
64 of noradrenaline and acetylcholine from synaptic terminals in the cortex (Reimer et al., 2016),  
65 indicating that non-invasive measurement of pupil-linked arousal enables the indirect inference of  
66 neuromodulatory tone in the brain.

67 To investigate the role of neuromodulation in shaping thalamo-cortical functional interaction, we  
68 monitored ongoing fluctuations in pupil-linked arousal in awake head-restrained ferrets, while  
69 simultaneously recording spiking and local field potential (LFP) activity from LP/Pulvinar and  
70 PPC (Fig. 1a). We found that the carrier frequency of thalamo-cortical synchronization varied with  
71 arousal, and that the direction of causal interaction between cortex and thalamus switched between  
72 low and high arousal levels. Moreover, we show that such transitions in network dynamics are not  
73 exclusive to ongoing activity in relative absence of visual input, but also occur when animals are  
74 actively engaged in sensory processing. We suggest that neuromodulators shape thalamo-cortical  
75 functional interaction by altering the relative contribution of thalamic and cortical signals to  
76 emergent network dynamics.

77

## 78 **Results**

### 79 **Reciprocal anatomical connectivity between PPC and LP/Pulvinar in the ferret**

80 Functional interaction between brain regions is constrained by structural connectivity. To map the  
81 precise anatomical connectivity of the regions of interest in this study, we injected anterograde  
82 (AAV5-CaMKII-mCherry) and retrograde (CTB-488) tracers into the left and right PPC,  
83 respectively (Fig. 1b,c). PPC injections were made at locations that corresponded to the site of  
84 cortical multielectrode array implantation in other animals (Supplementary Fig. 1). We observed  
85 anterograde labeled fibers in the ventral portion of LP/Pulvinar (Fig. 1d) indicating that PPC  
86 neurons send projections to this sub region of the thalamus. In addition, we observed retrograde  
87 labeled cell bodies at the corresponding location in the opposite hemisphere (Fig. 1d), indicating  
88 that LP/Pulvinar also projects back to the location of the injection site in PPC. These results  
89 indicate that regions of thalamus and cortex where electrophysiological recordings were obtained  
90 display reciprocal connectivity, establishing the physical substrate for studying how thalamo-  
91 cortical interaction varies with pupil-linked arousal.

### 92 **Pupil-linked arousal dependent changes in neuronal spiking and LFP spectra**

93 Given that both PPC and LP/Pulvinar receive dense projections from brainstem neuromodulatory  
94 systems (Foote and Morrison, 1987), we first examined how firing rate was modulated with pupil-  
95 linked arousal. Large and small pupil sizes indicated high and low arousal states, respectively.  
96 Consistent with previous *in vitro* and *in vivo* work on the influence of noradrenaline on neuronal  
97 excitability (McCormick, 1989; McCormick et al., 1993; McGinley et al., 2015a; McGinley et al.,  
98 2015b; Pape and McCormick, 1989; Polack et al., 2013; Rogawski and Aghajanian, 1980; Salgado  
99 et al., 2016), we found that neuronal firing rate at the population level in both PPC and LP/Pulvinar  
100 significantly increased with pupil diameter (Fig. 2b population, PPC:  $P = 0.003$  one-way ANOVA,  
101  $r = 0.30$ , LP/Pulvinar:  $P = 9.56 \times 10^{-11}$ ,  $r = 0.55$ ). Multi-unit spiking activity in PPC could be more  
102 generally separated into three groups based on correlation with pupil diameter (Supplementary  
103 Fig. 2); units that increased firing rate with pupil dilation (40.3% of units,  $n = 209/519$ ), units that  
104 decreased firing rate with pupil dilation (26.0% of units,  $n = 135/519$ ), and units that showed no  
105 significant correlation with pupil diameter (33.7% of units,  $n = 175/519$ ). Such diversity in PPC  
106 spiking activity related to arousal is in general agreement with work in mouse visual and frontal  
107 cortices, which found that subpopulations of neurons in mouse visual cortex either increased or

108 decreased firing rate with arousal (Garcia-Junco-Clemente et al., 2017; Vinck et al., 2015). In  
109 contrast to PPC, the majority of multi-units in LP/Pulvinar displayed increased firing rate with  
110 pupil diameter (72.2%,  $n = 122/169$ ), with only a negligible portion of units displaying a decrease  
111 in firing rate (3.0%,  $n = 5/169$ ). Together, these results suggest greater heterogeneity of spiking  
112 dependence on arousal in cortex, and may reflect the greater complexity and diversity of neuronal  
113 populations that comprise cortical circuits (Garcia-Junco-Clemente et al., 2017).

114 To examine how signatures of local network dynamics were altered by arousal, we computed  
115 changes in LFP power spectra as a function of pupil diameter (Figure 2c, d). Pupil diameter-related  
116 changes in LFP power were characterized by opposing effects on low ( $< 30$  Hz) and high frequency  
117 ( $> 30$  Hz) LFP oscillations in PPC (for raw power spectra, see Supplementary Fig. 3); low  
118 frequency power was stronger during small pupil diameter epochs, while high frequency power  
119 was stronger during large pupil diameter epochs (Figure 2c). LP/Pulvinar displayed similar pupil  
120 size-dependent antagonism between low and high frequency LFP signals, with the exception of  
121 LFP power in theta band (3.3-4.5 Hz), which displayed peak power during large pupil diameter  
122 epochs (Figure 2d). In both PPC and LP/Pulvinar, large pupil diameter epochs were associated  
123 with reduced LFP power in the 12-17 Hz frequency range. Since LFP signal power and thalamo-  
124 cortical coherence in 12-17 Hz frequency range was reduced during visual stimulation  
125 (Supplementary Fig. 3), we posit that rhythms in this frequency band represents a homologue of  
126 the alpha oscillation in the ferret.

127

## 128 **Arousal dependent modulation of thalamo-cortical synchronization**

129 Considering that complex behaviors such as attention require the coordination of neural activity  
130 between cortex and thalamus (Saalman et al., 2012), we next asked if signatures of thalamo-  
131 cortical functional interaction varied with ongoing fluctuations in pupil-linked arousal. We  
132 observed thalamo-cortical LFP phase synchronization in the theta and alpha carrier frequency  
133 bands (Figure 3a, Phase delay in theta band = 9.6ms, 0.55 circular variance; Phase delay in alpha  
134 band = 30.2ms, 0.78 circular variance). Strikingly, the strength of phase synchronization in these  
135 frequency bands was modulated in opposing directions by changes in pupil diameter, with theta  
136 phase synchronization significantly increasing ( $P < 0.01$  one-way ANOVA), and alpha phase

137 synchronization significantly decreasing with pupil dilation (Fig. 3a,  $P < 0.01$  one-way ANOVA;  
138 see Supplementary Fig. 4 for power-matched PLV analysis).

139 These results suggest that fluctuations in pupil-linked arousal coincide with a shift in the carrier  
140 frequency of thalamo-cortical functional interaction from the alpha band in low arousal states, to  
141 the theta band in high arousal states. In line with this hypothesis, spike cross-correlation analysis  
142 uncovered synchronous oscillatory patterns of thalamo-cortical neuronal firing occurring in the  
143 alpha band (Supplementary Fig. 5). Transition from small to large pupil diameter was marked by  
144 a significant decrease in oscillatory spike correlations in the alpha band (Supplementary Fig. 5c,  $P$   
145  $= 4.1 \cdot 10^{-6}$  one-way ANOVA,  $r = -0.42$ ). In addition to LFP-LFP and spike-spike correlations, we also  
146 observed spike-LFP phase synchronization in the alpha frequency band both locally within  
147 LP/Pulvinar and PPC, as well as between thalamus and cortex (Fig. 3b). Spike-LFP phase  
148 synchronization in the alpha band significantly decreased with pupil dilation locally within PPC,  
149 as well as between regions ( $P < 0.001$  one-way ANOVA). Consistent with previous work in  
150 humans (Bonnet and Arand, 2001), peak alpha frequency significantly increased in PPC with  
151 arousal (Supplementary Fig. 6,  $P = 0.003$  one-way ANOVA,  $r = 0.32$ ), however LP/Pulvinar  
152 displayed no such relationship. In contrast to results in the alpha band, spike-spike correlation and  
153 spike-LFP phase synchronization were weak in the theta frequency band both locally and between  
154 regions (Fig. 3b). Together, these results suggest that alpha rhythms synchronize thalamo-cortical  
155 network activity in low arousal states, with increasing arousal leading to the desynchronization of  
156 spiking activity and a transition to the theta carrier frequency for thalamo-cortical functional  
157 interaction.

158

### 159 **Arousal dependent thalamo-cortical effective connectivity**

160 Given that we observed two distinct carrier frequencies of thalamo-cortical functional interaction  
161 that were differentially modulated by arousal, we asked if activity in these frequency bands  
162 reflected directed interaction between LP/Pulvinar and PPC. We quantified directionality in  
163 thalamo-cortical interaction by computing spectrally resolved Granger causality and performing  
164 phase slope index (PSI) analyses between LP/Pulvinar and PPC LFP signals (Fig. 4a; see  
165 Supplementary Fig. 7 for PSI analysis). In line with previous results (Saalman et al., 2012), we  
166 found significant reciprocal causal interaction between PPC and LP/Pulvinar in the alpha

167 frequency band ( $P < 0.001$ , permutation test). However, in contrast to a previous report (Saalman  
168 et al., 2012), we found that the cortical influence on thalamus was significantly stronger than  
169 thalamic influence on cortex in the alpha band ( $P = 0.003$ , t-test). PSI analyses confirmed this  
170 result (Supplementary Fig. 7), with a larger proportion of cortical channels driving thalamus (32%)  
171 than vice versa (11%). Both Granger causality and PSI findings are consistent with the hypothesis  
172 that alpha rhythms arise from reciprocal interaction between thalamic and cortical alpha  
173 oscillators. In contrast to alpha rhythms, Granger causal interaction in the theta band was only  
174 observed from LP/Pulvinar to PPC ( $P < 0.001$  permutation test, Fig. 4a). PSI analyses agreed with  
175 this result, with 19% of channel pairs displaying significant thalamus-to-cortex interaction, while  
176 only 3% displayed significant cortex-to-thalamus interaction (Supplementary Fig. 7). Collectively,  
177 these results suggest that theta rhythms predominantly propagate from thalamus to cortex, while  
178 alpha rhythms propagate principally from cortex to thalamus.

179 To examine how thalamo-cortical effective connectivity is modulated by arousal, we recomputed  
180 Granger causality for epochs that represented the lower and upper 25% of pupil diameter for each  
181 recording, respectively. Since LFP power was highly dependent on arousal, we subsampled data  
182 to match power distributions across pupil diameter bins (Supplementary Fig. 8). The causal  
183 influence of PPC on LP/Pulvinar in the alpha band was significantly stronger for small pupil  
184 diameter states ( $P = 0.018$  t-test, Fig. 4b left). In contrast, LP/Pulvinar causal influence on PPC in  
185 the theta band was significantly stronger in large pupil diameter states ( $P = 0.0015$  t-test, Fig. 4b  
186 right). These results indicate that fluctuations in pupil linked arousal result in a dynamic switch in  
187 the predominant carrier frequency of thalamo-cortical communication and the direction of causal  
188 interaction between LP/Pulvinar and PPC.

189

## 190 **Thalamo-cortical network dynamics during visual processing**

191 Until now, we have examined how variability in thalamo-cortical network dynamics relate to  
192 ongoing fluctuations in pupil-linked arousal in the absence of visual input. Are such patterns of  
193 thalamo-cortical network dynamics exclusive to recordings in the dark, or are they reflective of  
194 more generalizable network states that also emerge during periods when animals are engaged in  
195 sensory processing? To answer this question, we investigated how patterns of activity in  
196 LP/Pulvinar and PPC are modulated in response to the presentation of naturalistic images or videos



197 (Figure 5a). Naturalistic visual stimuli elicited increased gamma power and decreased alpha power  
198 in both LP/Pulvinar and PPC (Figure 5b-c for videos; see Supplementary Fig. 9 for images). In  
199 general, naturalistic video stimuli elicited more robust spiking and LFP responses than static  
200 images (PPC static image firing rate =  $13.45 \pm 1.65$ , video firing rate =  $14.33 \pm 1.64$ ,  $P = 8.8^{-5}$ ,  
201 sign test; LP/Pulvinar static image firing rate =  $8.72 \pm 1.04$ , video firing rate =  $9.68 \pm 1.09$ ,  $P =$   
202  $8.0^{-7}$ , sign test). In the prestimulus period we found thalamo-cortical LFP synchronization at theta  
203 and alpha carrier frequencies (Figure 5d), similar to small pupil diameter states in the dark.  
204 However, upon presentation of video stimuli, thalamo-cortical synchronization rapidly shifted to  
205 the theta carrier frequency, with an accompanying reduction in alpha synchronization. Theta  
206 synchronization maintained throughout the duration of stimulus presentation, before returning to  
207 the theta and alpha carrier frequencies after stimulus offset (Figure 5d). Granger causality analysis  
208 confirmed that video stimuli induce a rapid reversal in the direction and carrier frequency of  
209 thalamo-cortical effective connectivity similar to what we observe during small and large pupil  
210 diameter epochs in the dark (Figure 5e). These findings suggest that during presentation of video  
211 stimuli the LP/Pulvinar – PPC network shifts towards a state defined by thalamus driven theta  
212 oscillations. In addition, these results illustrate that arousal dependent thalamo-cortical network  
213 states that spontaneously occur in the dark are also invoked when animals are processing sensory  
214 information.

### 215 **Thalamo-cortical network dynamics and pupil-linked arousal correlate with saccade** 216 **behavior**

217 What is the link between the emergence of these patterns of thalamo-cortical network dynamics  
218 and behavioral output? Given the well-established link between saccadic eye movements and  
219 cognitive processes (Liversedge and Findlay, 2000), we answer this question by examining how  
220 thalamo-cortical network dynamics relate to saccade behavior. Saccade kinetics in the ferret  
221 displayed similar characteristics to saccades in humans (Otero-Millan et al., 2008) and non-human  
222 primates (Bosman et al., 2009) (Figure 6a, Supplementary Fig 10), albeit with a lower overall  
223 saccade rate ( $0.32 \pm 0.03$  Hz). Animals displayed an elevated rate of saccades while viewing video  
224 stimuli ( $0.35 \pm 0.03$  saccades/s videos stimuli,  $0.19 \pm 0.02$  saccades/s prestimulus,  $P = 2.7^{-7}$  t-test,  
225 Figure 6b), illustrating that ferrets utilize saccades to actively sample the visual environment.

226 Animals also performed saccades in the dark (Supplementary Fig. 10), where saccade rate was  
227 significantly modulated by ongoing fluctuations in pupil diameter (Figure 6c,  $P = 3.80^{-15}$  one-way  
228 ANOVA). Indeed, saccade-triggered analysis of pupil diameter in the dark revealed that the pupil  
229 significantly dilated prior to the onset of saccadic eye movements ( $P = 0.004$  t-test, Figure 6d).  
230 This result suggests that oculomotor behavior may arise from a more general shift towards an  
231 aroused state. In line with this, PPC and LP/Pulvinar LFP power during saccades closely resembled  
232 power spectra for large pupil diameter states (Figure 2c-d), with power modulations occurring over  
233 a time course of several seconds around saccades (Figure 6e). Similarly, we observed a decrease  
234 in thalamo-cortical synchronization in the alpha band coinciding with saccades accompanied by a  
235 matching increase in theta band synchronization occurring over a slower timescale (Figure 6f).

236 To test if the direction of thalamo-cortical interaction also changed during saccade behavior, we  
237 computed spectrally resolved Granger causality analysis time-locked to saccades (Figure 6g).  
238 Saccades were associated with a significant decrease in PPC causal influence on LP/Pulvinar in  
239 the alpha band, accompanied by a significant increase of LP/Pulvinar causal influence on PPC in  
240 the theta band ( $P < 0.05$ , test against random saccade times, Supplementary Figure 11). These  
241 results strongly support the hypothesis that dynamic changes in thalamo-cortical causal interaction  
242 facilitate active visual sampling of the environment.

243 Recent work has shown that faster pupil dilations are correlated with noradrenergic input to cortex,  
244 whereas slower fluctuations are correlated with cholinergic input (Reimer et al., 2016). Consistent  
245 with a role for noradrenergic input in modifying thalamo-cortical network dynamics, we found  
246 striking shifts in spike rate, LFP power and saccade rate time locked to the occurrence of transient  
247 pupil dilations (Supplementary Fig. 12).

248 How do ongoing fluctuations in thalamo-cortical network dynamics affect the way animals sample  
249 visual stimuli? To answer this question, we correlated the number saccades performed during each  
250 trial of visual stimulus presentation with the strength of thalamo-cortical synchronization in the  
251 theta and alpha frequencies bands (Figure 7a). We found a significant positive correlation between  
252 synchronization in the theta band and the number of saccades performed per trial for both video  
253 and image stimulus conditions (Figure 7a for video stimuli,  $P = 0.0002$   $R = 0.17$ ; for image stimuli  
254 see Supplementary Fig. 13,  $P = 0.0009$   $R = 0.15$ ). In contrast, we found a significant negative  
255 correlation between synchronization in the alpha band and the number of saccades per trial (video

256 stimuli  $P = 0.011$   $R = -0.11$ ; image stimuli  $P = 0.0001$   $R = -0.17$ ). Thus, the state of the thalamo-  
257 cortical system as defined by its oscillatory functional connectivity indexed the level of  
258 engagement with the external world.

259 Finally, to show that fluctuations in pupil-linked arousal also affect how animals process incoming  
260 sensory information, we correlated the prestimulus pupil diameter with the latency of the first  
261 saccade for each trial. We found a significant negative correlation between prestimulus pupil  
262 diameter and first saccade latency for both image and video stimuli (Figure 7b,  $P = 0.0001$   $R = -$   
263  $0.19$  for video stimuli; for images see Supplementary Fig. 13b,  $P = 6.39^{-5}$   $R = -0.22$ ), indicating  
264 that animals sampled more rapidly when incoming sensory input arrived during a state of  
265 heightened arousal. Taken together, these results show that ongoing fluctuations in pupil-linked  
266 arousal and associated changes in thalamo-cortical functional interaction affect the way in which  
267 animals sample the external environment with saccadic eye movements.

268

## 269 **Discussion**

270 Due to their reciprocal connectivity with widely distributed cortical areas, higher-order thalamic  
271 structures are proposed to play an important role in orchestrating patterns of large-scale cortico-  
272 cortical and thalamo-cortical interaction that underlie cognition (Saalmann and Kastner, 2011). Our  
273 results provide the first evidence that pupil-linked arousal, and by extension neuromodulation, play  
274 an important role in dynamically sculpting these patterns of thalamo-cortical functional  
275 interaction. We demonstrate that ongoing fluctuations in pupil-linked arousal lead to dynamic  
276 switching of both the direction and carrier frequency of thalamo-cortical communication, with low  
277 arousal states marked by cortical alpha oscillations driving synchronized activity between  
278 LP/Pulvinar and PPC, while higher arousal states were marked by LP/Pulvinar driving PPC in the  
279 theta frequency band. Furthermore, we show similar transitions in thalamo-cortical network  
280 dynamics during visual processing, and in particular, during active sampling of the external  
281 environment via saccades.

282 How does cortically driven alpha synchronization in thalamo-cortical networks facilitate the  
283 computations that underlie cognition in states of low arousal? One prominent hypothesis is that  
284 alpha oscillations reflect the precise temporal parsing of cortical activity via phasic inhibition  
285 (Klimesch, 2012). Under this framework, layer 5 projection neurons in PPC entrain local alpha  
286 oscillations in the LP/Pulvinar through pulsed volleys of action potentials. Given that LP/Pulvinar  
287 projections to superficial layers of early visual cortex influence cortical state (Purushothaman et  
288 al., 2012; Roth et al., 2016), PPC to LP/Pulvinar synchronization in the alpha band may act to gate  
289 or suppress the processing of incoming sensory information at early stages of visual cortex.  
290 Beyond this gating role, alpha oscillations have also been associated with cognitive processes that  
291 require internalization of attention, such as working memory (Klimesch, 2012; Roux and Uhlhaas,  
292 2014) and creativity (Fink and Benedek, 2014). In agreement with the internalization of attention,  
293 we consistently observed reduced saccade behavior during periods of elevated alpha oscillations.  
294 Similar to humans (Adrian, 1934), this alpha-dominant mode of network dynamics was disrupted  
295 by the presentation of visual stimuli. Interestingly, we found that the degree to which animals  
296 actively sampled stimuli with saccades was negatively correlated with thalamo-cortical  
297 synchronization in the alpha band. Thus, the dynamic switching away from the synchronized alpha

298 oscillation network state may be a signature of the transition between internalized and overt  
299 processes of attention.

300 We note that the endogenous alpha frequency identified here does not match the classic 10 Hz  
301 rhythm reported in humans. Indeed, we favor a definition of neural rhythms based on underlying  
302 physiological mechanisms, as opposed to the arbitrary assignment of bands based on carrier  
303 frequency. Given that alpha oscillations are proposed to arise through reciprocal thalamo-cortical  
304 interaction (Bollimunta et al., 2011), it is unsurprising that these rhythms exhibit a shorter period  
305 in animals with smaller brains (and therefore shorter conduction delays), such as dogs (da Silva et  
306 al., 1973), cats (Hughes et al., 2004), and ferrets (Stitt et al., 2015).

307 In contrast to states of low arousal, thalamus-driven theta oscillations during states of high arousal  
308 were associated with an increase in saccade behavior. We found that transitions between alpha-  
309 and theta-dominant modes of thalamo-cortical synchronization arose transiently around the  
310 occurrence of saccades. These data suggest that the causal influence of thalamus on cortex in the  
311 theta band may play a role in active visual sampling and overt attention. Lending support to this,  
312 previous studies in primates found that cortical LFP signals synchronize to microsaccades  
313 occurring rhythmically at the theta frequency (Bosman et al., 2009). Furthermore, theta oscillations  
314 temporally coordinate gamma band synchronization between lower and higher order visual  
315 cortices during attention allocation (Bosman et al., 2012). Therefore, the thalamic causal influence  
316 on cortex in the theta band may represent a mechanism to selectively synchronize distributed visual  
317 cortical regions (Jones, 2001; Saalman et al., 2012), facilitating visual exploration and attentional  
318 selection. Given that LP/Pulvinar is reciprocally connected with widely distributed visual cortical  
319 regions, it certainly exhibits the anatomical framework to play such a role in orchestrating cortical  
320 network dynamics and information routing (Jones, 2001). However, we observed only weak  
321 locking of spiking activity to theta oscillation phase in LP/Pulvinar, suggesting the inputs that  
322 synchronize LP/Pulvinar and PPC theta oscillations are likely subthreshold and do not  
323 predominantly originate from the population of LP/Pulvinar neurons we recorded from.  
324 Alternatively, these theta-synchronizing inputs may originate from other brain regions such as  
325 prefrontal cortex (Saalman, 2014).

326 Fluctuations in pupil diameter under constant luminance have been used as a general measure of  
327 arousal and cognitive load (Laeng et al., 2012). A common assumption regarding the relationship

328 between pupil diameter and arousal was that the locus coeruleus (LC), the main source of  
329 noradrenergic neuromodulatory input to the forebrain, must somehow form part of the brainstem  
330 circuit that controls pupil motility. Indeed, several invasive electrophysiological studies in  
331 monkeys have shown that fluctuations in pupil diameter under constant luminance are correlated  
332 to neural activity in the LC (Aston-Jones and Cohen, 2005; Joshi et al., 2016). However,  
333 correlations were generally weak, and no direct anatomical connection linking the LC and  
334 brainstem pupil motility nuclei could be found to explain such correlations (Nieuwenhuis et al.,  
335 2011; Wang and Munoz, 2015). In a recent study Reimer et al (2016) showed that fluctuations in  
336 pupil diameter track both noradrenergic and cholinergic input to cortex, with more rapid pupil  
337 dilations reflecting changes in noradrenergic input, and longer-lasting fluctuations reflecting the  
338 sustained activity of cholinergic synapses. Considering that we observe strong transitions in  
339 activity patterns and saccade behavior time locked to transient pupil dilation events  
340 (Supplementary Fig. 12), we postulate that noradrenergic neuromodulation plays a crucial role in  
341 shaping thalamo-cortical network dynamics and oculomotor behavior.

342 How do ongoing fluctuations in neuromodulatory tone alter large-scale network interactions in the  
343 brain? Previous in vitro work has classified in detail the effects of various neuromodulatory  
344 subsystems on intrinsic cellular properties (McCormick, 1989; McCormick et al., 1993; Pape and  
345 McCormick, 1989; Rogawski and Aghajanian, 1980; Salgado et al., 2016) and the generation of  
346 rhythmic activity in local circuits (Lorincz et al., 2008). However, these local cellular changes do  
347 not explain the dynamic rerouting of thalamo-cortical communication that we observe at the  
348 network level. Experimental evidence relating pupil-linked arousal or neuromodulatory tone to the  
349 dynamic reorganization of network-level interaction is sparse. Recent data has shown that  
350 pharmacological blocking of noradrenaline reuptake in humans leads to a network-specific  
351 reduction in the correlation of hemodynamic signals between brain regions (van den Brink et al.,  
352 2016). These findings are consistent with our results on the pupil-linked arousal related reduction  
353 in thalamo-cortical spike correlations.

354 Perhaps the most compelling mechanistic description of how neuromodulation shapes network  
355 interactions has come from computational modeling and theoretic studies of complex networks.  
356 Most recently, Heeger (2017) proposed a computational framework of cortical processing where  
357 network dynamics emerge from the interaction of feedforward and feedback inputs, as well as

358 prior (expectation) driving factors. In this model, a number of state parameters modify the relative  
359 contribution of feedforward and feedback processing stages toward the predominating network  
360 dynamic. Our findings support Heeger's hypothesis that such state parameters represent the  
361 various neuromodulatory subsystems. Furthermore, Kirst et al (2016) showed that alteration of  
362 low-level features of complex networks not only leads to perturbations in the collective dynamics  
363 of the network, but can also result in the self-organized rerouting of information flow between  
364 network modules. Therefore, although neuromodulators act primarily on intrinsic cellular  
365 properties of neurons in cortex and thalamus, when translated to the network level, these local  
366 changes may lead to emergent shifts in thalamo-cortical functional interaction.

367 Although we studied the LP/Pulvinar – PPC thalamo-cortical network here, we speculate that our  
368 findings on arousal-dependent changes in interaction may generalize to other thalamo-cortical  
369 networks, and perhaps even modes of cortico-cortical functional interaction. One intriguing  
370 possibility is that subpopulations of neurons in the LC or basal forebrain differentially modulate  
371 the dynamics of specific sub-networks in the brain. Indeed, the heterogeneous nature of LC  
372 neuronal activity (Totah et al., 2017) coupled with non-overlapping projection patterns of  
373 ascending neuromodulatory fibers (Chandler et al., 2014) may enable such network specific  
374 modulation of functional interaction.

375 Extending these results further, we speculate that deficiencies in the neuromodulatory control of  
376 large-scale network interaction may represent a key mechanism underlying the pathology of  
377 various neuropsychiatric disorders (Uhlhaas and Singer, 2012). A broader understanding of how  
378 neuromodulators shape functional interaction within affected brain networks will enable the  
379 targeted design of therapies aimed at restoring physiological patterns of network dynamics.

380

381 **References**

- 382 Adrian, E.D.M., B. H. C. (1934). The Berger rhythm; potential changes from the occipital lobes in man.  
383 *Brain* 57, 355-385.
- 384 Aston-Jones, G., and Cohen, J.D. (2005). An integrative theory of locus coeruleus-norepinephrine  
385 function: adaptive gain and optimal performance. *Annual review of neuroscience* 28, 403-450.
- 386 Barnett, L., and Seth, A.K. (2014). The MVGC multivariate Granger causality toolbox: a new approach to  
387 Granger-causal inference. *Journal of neuroscience methods* 223, 50-68.
- 388 Bollimunta, A., Mo, J., Schroeder, C.E., and Ding, M. (2011). Neuronal mechanisms and attentional  
389 modulation of corticothalamic alpha oscillations. *The Journal of neuroscience : the official journal of the*  
390 *Society for Neuroscience* 31, 4935-4943.
- 391 Bonnet, M.H., and Arand, D.L. (2001). Impact of activity and arousal upon spectral EEG parameters.  
392 *Physiology & behavior* 74, 291-298.
- 393 Bosman, C.A., Schoffelen, J.M., Brunet, N., Oostenveld, R., Bastos, A.M., Womelsdorf, T., Rubehn, B.,  
394 Stieglitz, T., De Weerd, P., and Fries, P. (2012). Attentional stimulus selection through selective  
395 synchronization between monkey visual areas. *Neuron* 75, 875-888.
- 396 Bosman, C.A., Womelsdorf, T., Desimone, R., and Fries, P. (2009). A microsaccadic rhythm modulates  
397 gamma-band synchronization and behavior. *The Journal of neuroscience : the official journal of the*  
398 *Society for Neuroscience* 29, 9471-9480.
- 399 Chandler, D.J., Gao, W.J., and Waterhouse, B.D. (2014). Heterogeneous organization of the locus  
400 coeruleus projections to prefrontal and motor cortices. *Proceedings of the National Academy of*  
401 *Sciences of the United States of America* 111, 6816-6821.
- 402 da Silva, F.H., van Lierop, T.H., Schrijer, C.F., and van Leeuwen, W.S. (1973). Organization of thalamic and  
403 cortical alpha rhythms: spectra and coherences. *Electroencephalography and clinical neurophysiology*  
404 35, 627-639.
- 405 Deco, G., Jirsa, V.K., and McIntosh, A.R. (2011). Emerging concepts for the dynamical organization of  
406 resting-state activity in the brain. *Nature reviews Neuroscience* 12, 43-56.
- 407 Fink, A., and Benedek, M. (2014). EEG alpha power and creative ideation. *Neuroscience and*  
408 *biobehavioral reviews* 44, 111-123.
- 409 Foote, S.L., and Morrison, J.H. (1987). Extrathalamic modulation of cortical function. *Annual review of*  
410 *neuroscience* 10, 67-95.
- 411 Fries, P. (2015). Rhythms for Cognition: Communication through Coherence. *Neuron* 88, 220-235.
- 412 Garcia-Junco-Clemente, P., Ikrar, T., Tring, E., Xu, X., Ringach, D.L., and Trachtenberg, J.T. (2017). An  
413 inhibitory pull-push circuit in frontal cortex. *Nature neuroscience*.
- 414 Geweke, J. (1982). Measurement of linear dependence and feedback between multiple time series.  
415 *Journal of the American Statistical Association* 77, 304-313.
- 416 Granger, C. (1969). Investigating causal relations by econometric models and cross-spectral methods.  
417 *Econometrica* 37, 424-438.
- 418 Heeger, D.J. (2017). Theory of cortical function. *Proceedings of the National Academy of Sciences of the*  
419 *United States of America*.
- 420 Hughes, S.W., Lorincz, M., Cope, D.W., Blethyn, K.L., Kekesi, K.A., Parri, H.R., Juhasz, G., and Crunelli, V.  
421 (2004). Synchronized oscillations at alpha and theta frequencies in the lateral geniculate nucleus.  
422 *Neuron* 42, 253-268.
- 423 Jones, E.G. (2001). The thalamic matrix and thalamocortical synchrony. *Trends in neurosciences* 24, 595-  
424 601.
- 425 Joshi, S., Li, Y., Kalwani, R.M., and Gold, J.I. (2016). Relationships between Pupil Diameter and Neuronal  
426 Activity in the Locus Coeruleus, Colliculi, and Cingulate Cortex. *Neuron* 89, 221-234.



- 427 Kirst, C., Timme, M., and Battaglia, D. (2016). Dynamic information routing in complex networks. *Nature*  
428 *communications* 7, 11061.
- 429 Klimesch, W. (2012). alpha-band oscillations, attention, and controlled access to stored information.  
430 *Trends in cognitive sciences* 16, 606-617.
- 431 Koch, C., Massimini, M., Boly, M., and Tononi, G. (2016). Neural correlates of consciousness: progress  
432 and problems. *Nature reviews Neuroscience* 17, 307-321.
- 433 Lachaux, J.P., Rodriguez, E., Martinerie, J., and Varela, F.J. (1999). Measuring phase synchrony in brain  
434 signals. *Human brain mapping* 8, 194-208.
- 435 Laeng, B., Sirois, S., and Gredeback, G. (2012). Pupillometry: A Window to the Preconscious?  
436 *Perspectives on psychological science : a journal of the Association for Psychological Science* 7, 18-27.
- 437 Liversedge, S.P., and Findlay, J.M. (2000). Saccadic eye movements and cognition. *Trends in cognitive*  
438 *sciences* 4, 6-14.
- 439 Lorincz, M.L., Crunelli, V., and Hughes, S.W. (2008). Cellular dynamics of cholinergically induced alpha (8-  
440 13 Hz) rhythms in sensory thalamic nuclei in vitro. *The Journal of neuroscience : the official journal of*  
441 *the Society for Neuroscience* 28, 660-671.
- 442 Manger, P.R., Masiello, I., and Innocenti, G.M. (2002). Areal organization of the posterior parietal cortex  
443 of the ferret (*Mustela putorius*). *Cerebral cortex (New York, NY : 1991)* 12, 1280-1297.
- 444 McCormick, D.A. (1989). Cholinergic and noradrenergic modulation of thalamocortical processing.  
445 *Trends in neurosciences* 12, 215-221.
- 446 McCormick, D.A., Wang, Z., and Huguenard, J. (1993). Neurotransmitter control of neocortical neuronal  
447 activity and excitability. *Cerebral cortex (New York, NY : 1991)* 3, 387-398.
- 448 McGinley, M.J., David, S.V., and McCormick, D.A. (2015a). Cortical Membrane Potential Signature of  
449 Optimal States for Sensory Signal Detection. *Neuron* 87, 179-192.
- 450 McGinley, M.J., Vinck, M., Reimer, J., Batista-Brito, R., Zagha, E., Cadwell, C.R., Tolias, A.S., Cardin, J.A.,  
451 and McCormick, D.A. (2015b). Waking State: Rapid Variations Modulate Neural and Behavioral  
452 Responses. *Neuron* 87, 1143-1161.
- 453 Nieuwenhuis, S., De Geus, E.J., and Aston-Jones, G. (2011). The anatomical and functional relationship  
454 between the P3 and autonomic components of the orienting response. *Psychophysiology* 48, 162-175.
- 455 Nolte, G., Ziehe, A., Nikulin, V.V., Schlogl, A., Kramer, N., Brismar, T., and Muller, K.R. (2008). Robustly  
456 estimating the flow direction of information in complex physical systems. *Physical review letters* 100,  
457 234101.
- 458 Otero-Millan, J., Troncoso, X.G., Macknik, S.L., Serrano-Pedraza, I., and Martinez-Conde, S. (2008).  
459 Saccades and microsaccades during visual fixation, exploration, and search: foundations for a common  
460 saccadic generator. *Journal of vision* 8, 21.21-18.
- 461 Pape, H.C., and McCormick, D.A. (1989). Noradrenaline and serotonin selectively modulate thalamic  
462 burst firing by enhancing a hyperpolarization-activated cation current. *Nature* 340, 715-718.
- 463 Polack, P.O., Friedman, J., and Golshani, P. (2013). Cellular mechanisms of brain state-dependent gain  
464 modulation in visual cortex. *Nature neuroscience* 16, 1331-1339.
- 465 Purushothaman, G., Marion, R., Li, K., and Casagrande, V.A. (2012). Gating and control of primary visual  
466 cortex by pulvinar. *Nature neuroscience* 15, 905-912.
- 467 R. Kronland-Martinet, J.M., A. Grossmann (1987). Analysis of sound patterns through wavelet  
468 transforms. *International Journal of Pattern Recognition and Artificial Intelligence* 1, 273-302.
- 469 Reimer, J., McGinley, M.J., Liu, Y., Rodenkirch, C., Wang, Q., McCormick, D.A., and Tolias, A.S. (2016).  
470 Pupil fluctuations track rapid changes in adrenergic and cholinergic activity in cortex. *Nature*  
471 *communications* 7, 13289.
- 472 Rogawski, M.A., and Aghajanian, G.K. (1980). Modulation of lateral geniculate neurone excitability by  
473 noradrenaline microiontophoresis or locus coeruleus stimulation. *Nature* 287, 731-734.

474 Roth, M.M., Dahmen, J.C., Muir, D.R., Imhof, F., Martini, F.J., and Hofer, S.B. (2016). Thalamic nuclei  
475 convey diverse contextual information to layer 1 of visual cortex. *Nature neuroscience* 19, 299-307.  
476 Roux, F., and Uhlhaas, P.J. (2014). Working memory and neural oscillations: alpha-gamma versus theta-  
477 gamma codes for distinct WM information? *Trends in cognitive sciences* 18, 16-25.  
478 Saalman, Y.B. (2014). Intralaminar and medial thalamic influence on cortical synchrony, information  
479 transmission and cognition. *Frontiers in systems neuroscience* 8, 83.  
480 Saalman, Y.B., and Kastner, S. (2011). Cognitive and perceptual functions of the visual thalamus.  
481 *Neuron* 71, 209-223.  
482 Saalman, Y.B., Pinsk, M.A., Wang, L., Li, X., and Kastner, S. (2012). The pulvinar regulates information  
483 transmission between cortical areas based on attention demands. *Science (New York, NY)* 337, 753-756.  
484 Salgado, H., Trevino, M., and Atzori, M. (2016). Layer- and area-specific actions of norepinephrine on  
485 cortical synaptic transmission. *Brain research* 1641, 163-176.  
486 Siegel, M., Donner, T.H., and Engel, A.K. (2012). Spectral fingerprints of large-scale neuronal interactions.  
487 *Nature reviews Neuroscience* 13, 121-134.  
488 Stitt, I., Galindo-Leon, E., Pieper, F., Engler, G., Fiedler, E., Stieglitz, T., and Engel, A.K. (2015). Intrinsic  
489 coupling modes reveal the functional architecture of cortico-tectal networks. *Science advances* 1,  
490 e1500229.  
491 Tallon-Baudry, C., Bertrand, O., Delpuech, C., and Permier, J. (1997). Oscillatory gamma-band (30-70 Hz)  
492 activity induced by a visual search task in humans. *The Journal of neuroscience : the official journal of*  
493 *the Society for Neuroscience* 17, 722-734.  
494 Totah, N.K., Neves, R.M., Panzeri, S., Logothetis, N.K., and Eschenko, O. (2017). Monitoring large  
495 populations of locus coeruleus neurons reveals the non-global nature of the norepinephrine  
496 neuromodulatory system. *bioRxiv*.  
497 Uhlhaas, P.J., and Singer, W. (2012). Neuronal dynamics and neuropsychiatric disorders: toward a  
498 translational paradigm for dysfunctional large-scale networks. *Neuron* 75, 963-980.  
499 van den Brink, R.L., Pfeffer, T., Warren, C.M., Murphy, P.R., Tona, K.D., van der Wee, N.J., Giltay, E., van  
500 Noorden, M.S., Rombouts, S.A., Donner, T.H., and Nieuwenhuis, S. (2016). Catecholaminergic  
501 Neuromodulation Shapes Intrinsic MRI Functional Connectivity in the Human Brain. *The Journal of*  
502 *neuroscience : the official journal of the Society for Neuroscience* 36, 7865-7876.  
503 Vinck, M., Batista-Brito, R., Knoblich, U., and Cardin, J.A. (2015). Arousal and locomotion make distinct  
504 contributions to cortical activity patterns and visual encoding. *Neuron* 86, 740-754.  
505 Wang, C.A., and Munoz, D.P. (2015). A circuit for pupil orienting responses: implications for cognitive  
506 modulation of pupil size. *Current opinion in neurobiology* 33, 134-140.  
507 Wong-Riley, M. (1979). Changes in the visual system of monocularly sutured or enucleated cats  
508 demonstrable with cytochrome oxidase histochemistry. *Brain research* 171, 11-28.  
509 Yu, C., Sellers, K.K., Radtke-Schuller, S., Lu, J., Xing, L., Ghukasyan, V., Li, Y., Shih, Y.Y., Murrow, R., and  
510 Frohlich, F. (2016). Structural and functional connectivity between the lateral posterior-pulvinar complex  
511 and primary visual cortex in the ferret. *The European journal of neuroscience* 43, 230-244.  
512 Zaghera, E., and McCormick, D.A. (2014). Neural control of brain state. *Current opinion in neurobiology* 29,  
513 178-186.

514

515

516 **Acknowledgements:** We thank V. Crunelli, T. Pfeffer, A. Urai, K. Sellers, and Y. Li for comments  
517 on the manuscript; C. Yu for technical advice on obtaining recordings from LP/Pulvinar in ferrets;  
518 and G. Nolte for advice on data analysis.

519

520 **Author Contributions:** I.S. and F.F. conceived and designed experiments. I.S. and Z.C.Z.  
521 performed implantation of microelectrode arrays, recorded data, and performed anatomical tracing  
522 experiments. S.R.S interpreted anatomical data. I.S analyzed pupil and electrophysiological data.  
523 I.S., Z.C.Z., and F.F. wrote the paper. All authors contributed to the discussion of the results and  
524 revision of the manuscript.

525

526 **Methods**

527 **Animals**

528 Five adult spayed female ferrets (*Mustela putorius furo*) were used in this study. Animals had ad  
529 libitum access to food pellets and water, and were group housed in cages under standard ambient  
530 conditions (12 hour day/light cycle). All animal procedures were performed in compliance with  
531 the National Institutes of Health guide for the care and use of laboratory animals (NIH Publications  
532 No. 8023, revised 1978) and the United States Department of Agriculture, and were approved by  
533 the Institutional Animal Care and Use Committee of the University of North Carolina at Chapel  
534 Hill.

535

536 **Headpost and electrode implantation**

537 Animals were initially anesthetized with an intramuscular injection of ketamine/xylazine  
538 (30mg/kg of ketamine, 1–2mg/kg of xylazine). After loss of the paw pinch reflex, animals were  
539 intubated to enable artificial ventilation and delivery of isoflurane anesthesia (0.5-2% isoflurane  
540 in 100% oxygen). Throughout surgical procedures, physiological parameters such as the  
541 electrocardiogram, end-tidal CO<sub>2</sub>, partial oxygen concentration, and rectal temperature were  
542 constantly monitored to maintain the state of the animal. All surgical procedures were performed  
543 under sterile conditions. To enable the accurate planning of LP/Pulvinar electrode penetrations,  
544 animals were fixed into a stereotactic frame with stainless steel ear bars. The skull was then tilted  
545 such that it was oriented perpendicular to the surface of the surgical table. The skin and muscle  
546 were reflected to expose the surface of the skull. A custom-designed stainless steel headpost was  
547 firmly secured to the anterior extent of the exposed skull with bone screws. A craniotomy was  
548 performed on the left hemisphere to expose PPC(Manger et al., 2002) and the cortex overlying  
549 LP/Pulvinar. The dura was carefully removed, before lowering a multielectrode array into  
550 LP/Pulvinar along stereotactic coordinates(Yu et al., 2016) (2x8 tungsten electrodes, 250µm  
551 spacing, 9mm length, Microprobes for Life Science). A second multielectrode array (4x8 tungsten  
552 electrodes, 200µm spacing, Innovative Neurophysiology) was then inserted into the deep cortical  
553 layers of PPC. Both microelectrode arrays had reference electrodes that were directly adjacent to  
554 recording electrodes in the brain. In 3 animals, the PPC electrode was placed into the lateral gyrus,  
555 while in 1 animal the PPC electrode was placed in the suprasylvian gyrus. Multielectrode arrays  
556 were fixed in place with dental cement. Skin and muscle around the incision was then sutured

557 together. After surgery, animals were administered preventative analgesics and antibiotics for one  
558 week. Animals were allowed to recover in their home cage for at least one week prior to recordings.

### 559 **Anatomical tracing experiments**

560 One adult female ferret was used for anatomical tracing. Preparation of the animal for aseptic  
561 surgery was performed according to procedures described above. Craniotomies were drilled above  
562 the PPC on both hemispheres and the dura was removed to expose the underlying cortical surface.  
563 A total of 0.8 $\mu$ L of anterograde tracer (rAAV5-CaMKII-mCherry; UNC Vector Core) was injected  
564 between depths of 800  $\mu$ m and 400  $\mu$ m below the cortical surface in the left hemisphere. The  
565 location of the injection matched coordinates of cortical microelectrode array implantation in  
566 animals used for electrophysiology experiments (Supplementary Fig. 1). Retrograde tracer (0.8 $\mu$ L  
567 cholera toxin subunit B conjugated to Alexa 488; Thermo Fisher Scientific) was injected at the  
568 corresponding location in the right hemisphere. Kwik-kast (World Precision Instruments) was  
569 applied to the cortex to seal the craniotomy, before a layer of dental cement was applied to prevent  
570 regrowth of tissue over the injection sites. Three weeks following tracer injection surgery, the  
571 animal was humanely euthanized with an overdose of ketamine/xylazine, and then perfused with  
572 0.1 M PBS initially, followed by 4% paraformaldehyde solution in 0.1 M PBS. After two days of  
573 fixation in 4 % paraformaldehyde, the brain was transferred to 30% sucrose in 0.1 M PBS solution  
574 for cryoprotection. The brain was then sectioned into 50  $\mu$ m slices using a cryostat (CM3050S,  
575 Leica Microsystems). Sections were imaged on a Nikon Eclipse 80i widefield microscope, with  
576 green, red, and brightfield images overlaid to construct composite images to illustrate fluorescent  
577 labeling in PPC and LP/Pulvinar.

578

### 579 **Recording procedure**

580 After recovery from surgery, animals were placed into a custom designed behavioral tube and were  
581 head-fixed with a stainless steel headpost clamp. PPC and LP/Pulvinar multichannel recording  
582 electrodes were then connected to a data acquisition system (INTAN technologies). An infra-red  
583 eye tracking camera was focused on the animal's right eye (ISCAN ETL-200), with instantaneous  
584 measurements of pupil diameter, and pupil center x/y position delivered as voltage signals to the  
585 data acquisition system. The infrared light source was positioned in the lower right of the animal's  
586 visual field and emitted non-visible light at a wavelength of 940 nm. Broadband extracellular

587 potentials from both multielectrode arrays and eye tracking data were sampled at 30 kHz. Unless  
588 otherwise stated, recordings took place in a completely dark room under constant luminance (0.6  
589 Fc). There was a dark adaptation period of at least 30 seconds prior to the start of each recording.  
590 To prevent animals from falling asleep while head-fixed, two experimenters engaged in verbal  
591 discourse in front of the animal. Recordings in the dark typically lasted between 8 to 13 minutes.  
592 In addition to recordings in the dark, data were collected also while animals passively viewed a  
593 library of 20 naturalistic images and 20 videos on a screen placed 28.5cm in front of the animal.  
594 The eye tracking camera and infra-red light source did not occlude the animal's view of any part  
595 of the screen. Images and videos were randomly interspersed with a stimulus duration of 10  
596 seconds. A gray screen was presented during the inter stimulus interval (inter-stimulus interval =  
597 10 seconds, Figure 5A). Visual stimuli were presented in a well-lit room (ambient luminance 32.6  
598 Fc). Data were collected from multiple sessions across several days or weeks from each animal  
599 (number of sessions per animal: 6, 4, 7, 8).

#### 600 **Verifying electrode positions with histology**

601 Animals were deeply anesthetized according to methods described above. Electrolytic lesions were  
602 then produced on both PPC and LP/Pulvinar probes by passing 5  $\mu$ A of current (10 second pulse)  
603 between selected recording electrodes and the reference electrode on each probe. Animals were  
604 perfused and brains sectioned according to procedures described above. Brain slices were washed  
605 with 0.1 M PBS and stained for cytochrome oxidase(Wong-Riley, 1979), and then imaged with a  
606 widefield microscope (Nikon Eclipse 80i; Nikon Instruments). Electrode positions in thalamus  
607 were confirmed by either the location of electrode tracks or electrolytic lesions. Electrodes that  
608 were deemed to fall outside of LP/Pulvinar were omitted from analysis (number of electrodes  
609 omitted per animal: 0, 2, 8, 6).

610

#### 611 **Data analysis**

612 All offline data analyses were performed using custom software in Matlab (Mathworks).

613 *Data preprocessing:* To extract multi-unit spiking activity from broadband extracellular potentials,  
614 we band-pass filtered data between 300 and 5000Hz and applied a threshold at -4 standard  
615 deviations. Spikes that were detected on more than 3 channels simultaneously were omitted from

616 further analysis. LFPs were obtained by low pass filtering broadband extracellular potentials at  
617 300 Hz in both the forward and reverse direction to avoid phase shifts (4<sup>th</sup> order Butterworth filter).  
618 LFPs were then downsampled to a sample rate of 1 kHz. Eye position and pupil diameter signals  
619 were processed in the same way as the LFP.

620 *Pupil diameter:* To enable a thorough analysis of neuronal dynamics related to changes in pupil  
621 dilation, pupil diameter time series were discretized into eight bins of equal size, such that each  
622 bin represented 12.5% of samples from the entire recording (Fig. 2a). If the total number of  
623 samples per pupil bin did not exceed 30 seconds of cumulative data, then the recording was  
624 discarded (n = 6).

625 *Saccade detection:* Eye azimuth and elevation signals were low pass filtered at 50 Hz to remove  
626 potential noise. Blinks were detected automatically, and data within  $\pm 1$  second from blinks were  
627 removed from analysis. Elevation and azimuth time series were converted into eye velocity  
628 vectors. A threshold was then set at 4 standard deviations of the eye velocity vector to detect  
629 saccades. A subset of recording sessions in the dark were excluded from saccade based analyses  
630 due to high frequency noise in eye-position signals (n = 12).

631 *Spectral decomposition:* Time frequency estimates were computed by convolving LFP time series  
632 with Morlet wavelets that were Gaussian shaped in both the time and frequency domain (R.  
633 Kronland-Martinet, 1987; Tallon-Baudry et al., 1997).

$$w(t, f_0) = (\sigma_t \sqrt{\pi})^{-1/2} e^{-t^2/2\sigma_t^2} e^{-2\pi i f_0 t}$$

634 Where  $w(t, f_0)$  is the complex Morlet wavelet at carrier frequency  $f_0$ , and  $\sigma_t$  is the standard  
635 deviation of the wavelet in the time domain.  $\sigma_t$  is defined as

$$\sigma_t = \frac{1}{2\pi\sigma_f}$$

636 Where  $\sigma_f$  is the standard deviation in the frequency domain, and is defined as a constant depending  
637 on the wavelet carrier frequency  $\sigma_f = f_0/7$ . Time frequency estimates  $X(t, f_0)$  were then  
638 computed by convolving LFP time series  $x(t)$  with complex Morlet wavelets  $w(t, f_0)$ .

$$X(t, f_0) = x(t) * w(t, f_0)$$

639 Where \* denotes the convolution operation. We convolved LFP signals with a family of 80 Morlet  
640 wavelets that had carrier frequencies logarithmically spaced between 0.5 and 128 Hz. The power  
641 of LFP signals across all carrier frequencies was computed by taking the absolute value of squared  
642 time frequency estimates.

643 *LFP phase synchronization*: To quantify phase synchronization between simultaneously recorded  
644 LFP signals, we computed the phase locking value (Lachaux et al., 1999) (PLV). Briefly, the phase  
645 angle between real and complex components of time frequency estimates was calculated for  
646 thalamic  $\theta^t$  and cortical  $\theta^c$  signals. PLV at the carrier frequency  $f_0$  for  $N$  samples was then  
647 defined by the following formula

$$PLV_{tc}(f_0) = \frac{1}{N} \left| \sum_{n=1}^N e^{i(\theta_n^t(f_0) - \theta_n^c(f_0))} \right|$$

648

649 Assuming a uniform circular distribution of phases, the magnitude of  $PLV_{tc}$  is biased towards 1  
650 with few observations, and towards 0 with many observations. To control for this bias, pupil  
651 diameter based PLV analyses were computed using a constant number of randomly drawn phase  
652 angles between conditions and animals (30000 samples equating to 30 seconds of data). This was  
653 repeated for each thalamo-cortical channel pair 100 times, with the mean  $PLV_{tc}$  across all  
654 permutations used for further analysis. For each recording session, the average thalamo-cortical  
655  $PLV_{tc}$  between all PPC and LP/Pulvinar channel pairs was calculated, and then used to compute  
656 the across-session average PLV.

657 One potential confound that arises when comparing PLV analyses between conditions with  
658 varying spectral power (for example alpha/theta power across pupil diameter bins), is that  
659 significant differences in PLV may emerge spuriously due to changes in the signal to noise ratio.  
660 To control for any potential signal to noise confounds for PLV estimates, we performed additional  
661 analyses where data were subsampled to match the power distributions across pupil diameter bins  
662 for each frequency band (Supplementary Fig. 4).

663 *Spike-LFP phase synchronization*: To determine the dependence of spike timing on LFP  
664 oscillation phase, we computed the PLV (Lachaux et al., 1999) between co-recorded spikes and  
665 LFPs both within and between brain regions. For within region analysis, spike PLV was computed



666 between all channel combinations on each microelectrode array. Spike PLV analysis was not  
667 computed using the LFP on the same electrode to avoid spectral bleeding of spike waveforms  
668 contaminating phase synchronization estimates. For between region analyses, spike PLV was  
669 computed for all thalamo-cortical channel pairs. The spike PLV at a carrier frequency of  $f_0$  for  $K$   
670 spikes was defined as

$$671 \quad PLV_{spike}(f_0) = \frac{1}{K} \left| \sum_{k=1}^K e^{i\theta_k^{spike}(f_0)} \right|$$

672 Where  $\theta^{spike}$  represents the instantaneous LFP phase at the occurrence of each spike. Spike PLVs  
673 were computed from 200 randomly drawn spikes for each channel pair combination. This process  
674 was repeated 40 times to obtain an estimate of the mean spike PLV. Channels where less than 200  
675 spikes were detected for each pupil diameter bin were omitted from spike PLV analysis.

676 *Granger causality:* We computed Granger causality to measure the directed influence thalamic  
677 LFPs have on cortical LFPs, and vice versa. Granger causality is rooted in the autoregressive (AR)  
678 modeling of time series, where future values of a process  $x(t)$  are modeled based on previous  
679 values of  $x(t)$ . In this framework, a separate process  $y(t)$  can be said to have a causal influence  
680 on  $x(t)$  if the past values of  $y(t)$ , when accounted for in a bivariate AR-model, improve the  
681 prediction of future values of  $x(t)$  beyond that obtained by the univariate AR-model of  $x(t)$   
682 alone(Granger, 1969). While classically employed in the time domain, the computation of Granger  
683 causality can be operationalized in the frequency domain to uncover the physiological carrier  
684 frequencies of directed interaction between brain regions(Geweke, 1982). We computed Granger  
685 causality between co-recorded LP/Pulvinar and PPC LFP signals in the frequency domain using  
686 the multivariate Granger causality (MVGC) toolbox for Matlab(Barnett and Seth, 2014). LFP  
687 signals from both regions were low-pass filtered at 100 Hz with a phase preserving filter, and then  
688 downsampled to 200 Hz. To reduce dimensionality, we computed representative signals from  
689 thalamus and cortex by calculating the median downsampled LFP signal across all channels in  
690 PPC and LP/Pulvinar microelectrode arrays. These signals were then windowed into segments of  
691 one second (200 samples) length. Model order was then selected based on the minimum Akaike  
692 information criterion value(Barnett and Seth, 2014), with a maximum model order of 20 allowed.  
693 Vector AR-models were then checked to ensure that they reliably captured the spectral content of

694 input data. Spectral Granger causality was then computed according to routines from the MVGC  
695 toolbox. A random permutation test was used determine the significance of Granger causality  
696 peaks for individual recording sessions. Data segments from one brain region were randomly  
697 shuffled in a procedure that maintained spectral content, while disturbing the temporal  
698 codependence of co-recorded LFP signals. Granger causality measured on shuffled data  
699 represented the directed interaction that arises by chance based on the spectral signatures of the  
700 underlying neural processes. This procedure was repeated 100 times to generate a distribution of  
701 thalamo-cortical causal influence expected by chance. The distance of original Granger causality  
702 estimates from the shuffled mean were expressed in terms of standard deviation of the shuffled  
703 distribution, with values larger than 3 indicating significant Granger causal influence ( $p < 0.01$ ).  
704 For Granger causality analysis based on pupil diameter, recordings were split into segments  
705 representing the lowest 25% or highest 25% of the pupil diameter distribution (Fig. 3b). Only data  
706 segments where pupil diameter was maintained in low or high states for more than one second  
707 were included. To control for signal to noise confounds, we subsampled data to match power  
708 distributions between low and high pupil diameter conditions (Supplementary Fig. 8). Power  
709 subsampling was performed based on the power of the predominant carrier frequency of thalamo-  
710 cortical causal influence in each direction (theta for LP/Pulvinar to PPC, alpha for PPC to  
711 LP/Pulvinar). To detect significant differences in the strength of Granger causality between low  
712 and high pupil diameter conditions, we performed t-tests on identified spectral peaks from data  
713 pooled across all recordings. In addition to pupil diameter linked granger causality, we computed  
714 time-resolved Granger causality around the occurrence of saccades with a sliding window of 1 s  
715 length and a step size of 0.25 s. To determine the significance of saccade related changes in  
716 Granger causality, we recomputed Granger causality at random time points throughout each  
717 recording session, where the number of data segments is equal to the number of detected saccades.  
718 This was repeated 1000 times for each recording session. Saccade triggered Granger causality  
719 spectra were then normalized by the mean and standard deviation of randomly computed Granger  
720 causality spectra. Significant time and frequency points were those that deviated from the mean of  
721 randomly computed Granger causality estimates by 2 standard deviations ( $p < 0.05$ ).

722 *Phase slope index:* Phase slope index (PSI) analysis is a non-autoregressive model based method  
723 that was used to quantify effective connectivity between co-recorded thalamic and cortical LFP  
724 signals. This form of analysis is grounded in the idea that if one brain region drives another brain

725 region with a constant time lag, then one might expect the relative phase lag between signals in  
726 each region to increase as a function of carrier frequency(Nolte et al., 2008). PSI analysis was  
727 computed as described previously(Nolte et al., 2008). Briefly, LFP time series were windowed  
728 into segments of 1024 samples and the Fast Fourier Transform (FFT) on each data segment was  
729 computed. The complex coherency between thalamic and cortical signals at a carrier frequency of  
730  $f_0$  was then defined as

$$731 \quad C_{tc}(f_0) = \frac{S_{tc}(f_0)}{\sqrt{S_{tt}(f_0)S_{cc}(f_0)}}$$

732 Where  $S_{tc}(f_0)$  represents the cross spectra, or the Fourier transform of thalamic signals  $\hat{y}_t$   
733 multiplied with the complex conjugate of the Fourier transform of cortical signals  $\hat{y}_c^*$

$$734 \quad S_{tc}(f_0) = \langle \hat{y}_t(f_0)\hat{y}_c^*(f_0) \rangle$$

735  $\langle \rangle$  indicates the computation of the expectation value. The phase slope is then computed across  
736 the frequency band of interest  $f \rightarrow F$  as follows

$$737 \quad \Psi_{tc} = \text{Imag}\left(\sum_f^F C_{tc}^*(f)C_{tc}(f + \delta f)\right)$$

738 Where  $*$  denotes the complex conjugate and  $\delta f$  denotes the  $(f + 1)^{th}$  resolved frequency of the  
739 Fourier transform. The standard deviation of  $\Psi_{tc}$  was estimated using the jackknife resampling  
740 method. Finally,  $\Psi_{tc}$  was normalized by the standard deviation to estimate significance of effective  
741 thalamo-cortical connectivity, with values above 2 indicating that thalamus significantly drives  
742 cortex, and values below -2 indicating that cortex significantly drives thalamus ( $p < 0.05$ ). We  
743 initially computed PSI using a sliding bandwidth of 4 Hz in the frequency domain to determine  
744 the carrier frequencies of thalamo-cortical effective connectivity. Since we observed both  
745 significant drivers and receivers across multiple frequency bands, the standard deviation of  
746 normalized PSI values was used to quantify the spread of reciprocal thalamo-cortical effective  
747 connectivity in the frequency domain. After identifying that the theta and alpha bands represent  
748 the carrier frequencies of thalamo-cortical effective connectivity, PSI values were recomputed  
749 using a frequency resolution of 2.5-6 Hz and 11-18 Hz for theta and alpha bands, respectively.  
750 Finally, as a control measure PSI was additionally computed for the gamma band (30-60 Hz).

751 *Spike-spike correlation:* Spike cross correlation analysis was used to determine the temporal  
752 dependence of co-recorded spiking activity in LP/Pulvinar and PPC. Spike time series in thalamus  
753 and cortex were binarized at a sample rate of 1 kHz. Cross correlation functions were then  
754 computed on binarized time series for all possible combinations of LP/Pulvinar and PPC channel  
755 pairs. To determine the oscillatory structure of spike cross correlations, an FFT was computed on  
756 spike cross correlation functions from -0.5 to 0.5 seconds, with oscillatory power defined as the  
757 absolute value of the square of the FFT at each carrier frequency. To determine the dependence of  
758 synchronized oscillations in spiking on pupil diameter, spike cross correlation functions were  
759 computed for spikes occurring during each pupil diameter bin. As above, the oscillatory power of  
760 pupil diameter dependent spike correlations was computed using a FFT for all pupil bins.

761 *Statistics:* All statistical tests were performed in Matlab (Mathworks). To test if neurophysiological  
762 and functional connectivity metrics significantly vary with fluctuations in pupil diameter, we  
763 computed a one-way ANOVA across the eight pupil diameter bins. For frequency resolved  
764 analyses, one-way ANOVAs were computed across the entire frequency spectrum, with p-values  
765 corrected for multiple comparisons using false discovery rate (Matlab function *mafdr.m*, with  
766 ‘*BHFDR*’ set to ‘*true*’). To quantify the linear relationship between neural dynamics and changes  
767 in pupil diameter, we computed the Pearson correlation of neuronal and functional connectivity  
768 variables across the eight pupil diameter bins.

769 *Code and data availability:* Electrophysiological and pupillometry data, as well as MATLAB code  
770 that was used to perform outlined analyses, can be made available from the corresponding author  
771 upon request.

- 772 51. Wong-Riley, M. Changes in the visual system of monocularly sutured or enucleated cats  
773 demonstrable with cytochrome oxidase histochemistry. *Brain research* **171**, 11-28 (1979).
- 774 52. Tallon-Baudry, C., Bertrand, O., Delpuech, C. & Pernier, J. Oscillatory gamma-band (30-70 Hz)  
775 activity induced by a visual search task in humans. *The Journal of neuroscience : the official journal of the*  
776 *Society for Neuroscience* **17**, 722-734 (1997).
- 777 53. R. Kronland-Martinet, J.M., A. Grossmann. Analysis of sound patterns through wavelet  
778 transforms. *International Journal of Pattern Recognition and Artificial Intelligence* **1**, 273-302 (1987).
- 779 54. Lachaux, J.P., Rodriguez, E., Martinerie, J. & Varela, F.J. Measuring phase synchrony in brain  
780 signals. *Human brain mapping* **8**, 194-208 (1999).
- 781 55. Granger, C. Investigating causal relations by econometric models and cross-spectral methods.  
782 *Econometrica* **37**, 424-438 (1969).
- 783 56. Geweke, J. Measurement of linear dependence and feedback between multiple time series.  
784 *Journal of the American Statistical Association* **77**, 304-313 (1982).

- 785 57. Barnett, L. & Seth, A.K. The MVGC multivariate Granger causality toolbox: a new approach to  
786 Granger-causal inference. *Journal of neuroscience methods* **223**, 50-68 (2014).  
787 58. Nolte, G., *et al.* Robustly estimating the flow direction of information in complex physical  
788 systems. *Physical review letters* **100**, 234101 (2008).  
789

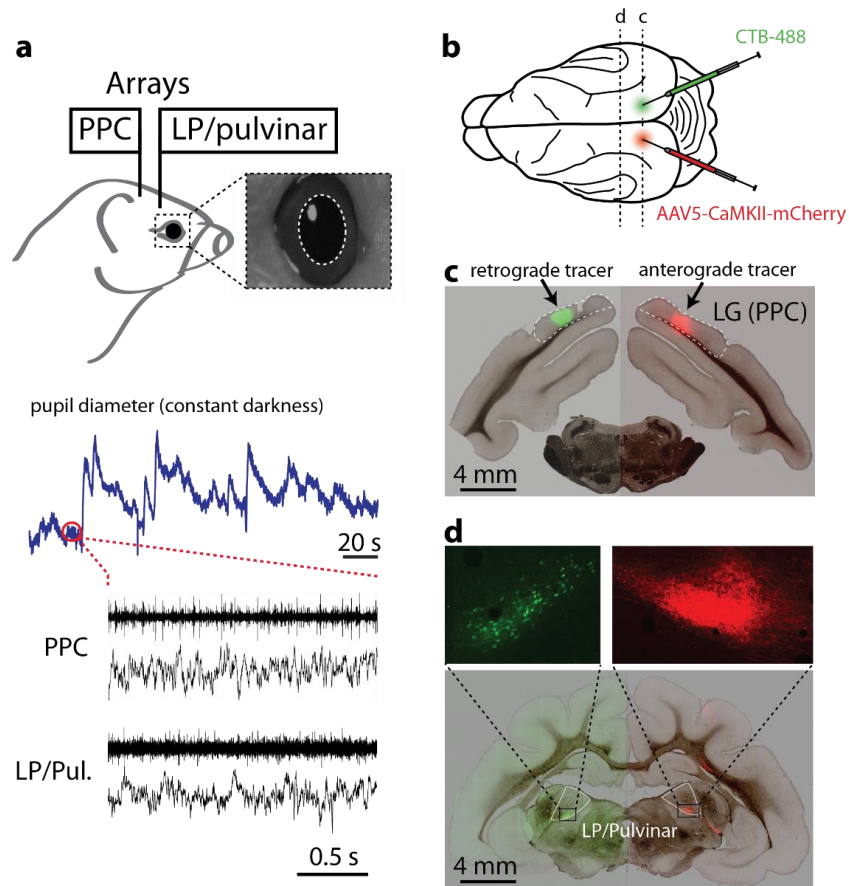

790

791

792 **Figure 1 / Experimental setup and anatomical connectivity between LP/Pulvinar and PPC.**

793 **a**, Diagram illustrating how neural signals from PPC and LP/Pulvinar were simultaneously  
794 recorded with pupil diameter. Inset image shows a typical view of the ferret infra-red eye tracking,

795 with the pupil outlined in white. Below are raw traces of ongoing fluctuations pupil diameter and  
796 co-recorded spiking and LFP activity in PPC and LP/Pulvinar. Note that pupil diameter

797 spontaneously fluctuates on both short and long time scales. **b**, Anterograde (rAAV5-CaMKII-  
798 mCherry) and retrograde (CTB-488) tracers were injected into PPC in the left and right

799 hemispheres, respectively. **c**, Brightfield image of a brain section containing the PPC injection  
800 sites overlaid with green and red fluorescence channels. Fluorescent blobs show the location of

801 anterograde and retrograde tracer in PPC. **d**, Brightfield image of thalamus overlaid with  
802 fluorescence from red and green channels. Retrograde labeling of cell bodies (green) and

803 anterograde labeling of axonal projections (red) in corresponding locations of LP/Pulvinar  
804 illustrate reciprocal connectivity between PPC and LP/Pulvinar in the ferret. Abbreviations: LG

805 lateral gyrus; PPC posterior parietal cortex.

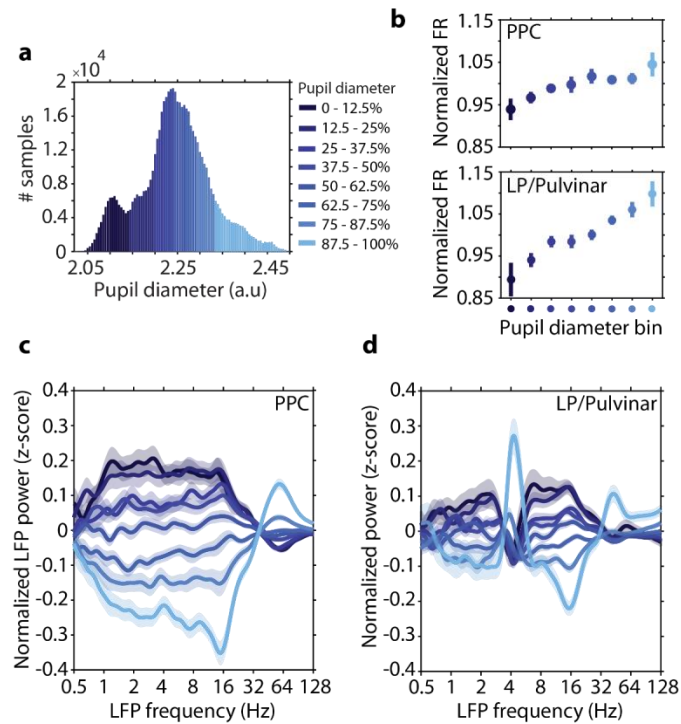

806

807

808 **Figure 2 / Neuronal spiking rate and LFP spectral power in PPC and LP/Pulvinar are**

809 **modulated with pupil diameter. a**, A representative example of how pupil diameter time series

810 were divided up into bins (each bin represents 12.5% of all samples). Neurophysiological data

811 were then analyzed according to pupil diameter bin. **b**, The normalized spiking rate in both PPC

812 and LP/Pulvinar increases with pupil dilation. Color denotes pupil diameter, as indicated in **a**. **c**,

813 The mean ( $\pm$  SEM) z-scored LFP power in PPC as a function of carrier frequency across pupil

814 diameter bins. Low (< 30 Hz) and high (> 30 Hz) frequency LFP power displayed opposing

815 relationships to pupil diameter. **d**, the same as **c** but for LP/Pulvinar LFP power. Note the

816 antagonism between low and high frequency LFP oscillatory power is similar to PPC, with the

817 exception of the theta band (~4 Hz), which displays increased power during large pupil diameter

818 states.

819

820

821

822

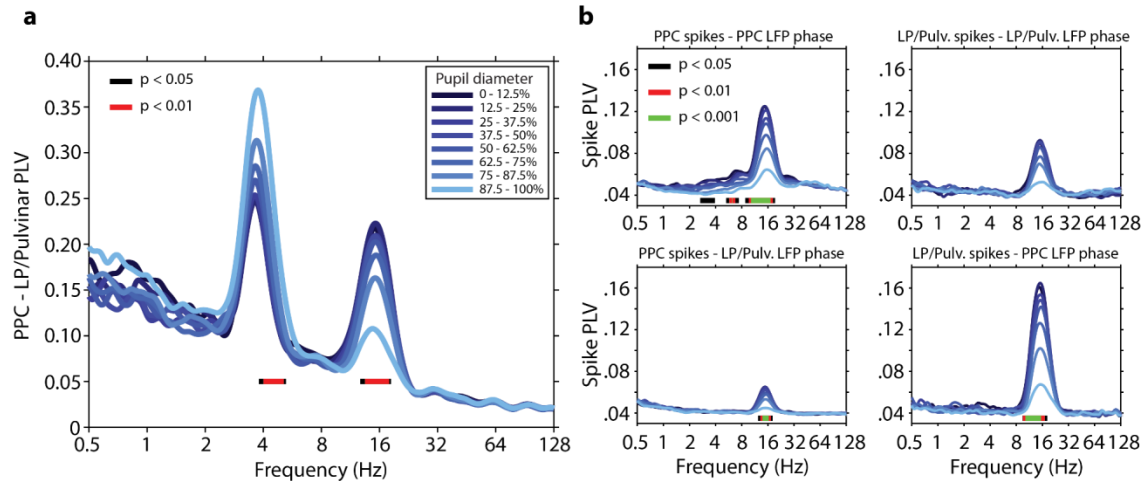

823

824

825 **Figure 3 / Thalamo-cortical synchronization varies with ongoing fluctuations in pupil-linked**

826 **arousal. a**, PLV measured between LP/Pulv and PPC as a function of LFP frequency and pupil

827 diameter. Pupil diameter is denoted by color (see legend). Note the prominent thalamo-cortical

828 phase synchronization in the theta (~4Hz) and alpha (12-17Hz) carrier frequency bands.

829 Significant modulation across pupil diameter bins is indicated by bars plotted below PLV traces

830 (one-way ANOVA, FDR-corrected P-values). PLV in the theta band significantly increased with

831 pupil dilation, while alpha PLV significantly decreased with pupil dilation. **b**, The phase

832 synchronization (PLV) of spiking activity to LFP rhythms recorded within the same brain structure

833 (top row), as well as between regions (bottom-row). Spike-PLV both locally within PPC and

834 LP/Pulv, as well as between PPC and LP/Pulv revealed phase locking of spiking activity

835 to alpha oscillations. Significant modulation of spike-PLV across pupil diameter bins is indicated

836 by color bars plotted below PLV traces (one-way ANOVA, FDR-corrected P-values). Note that

837 the strongest alpha band spike-PLV was observed between LP/pulvular spikes and PPC LFP phase.

838

839

840

841

842

843

844

845



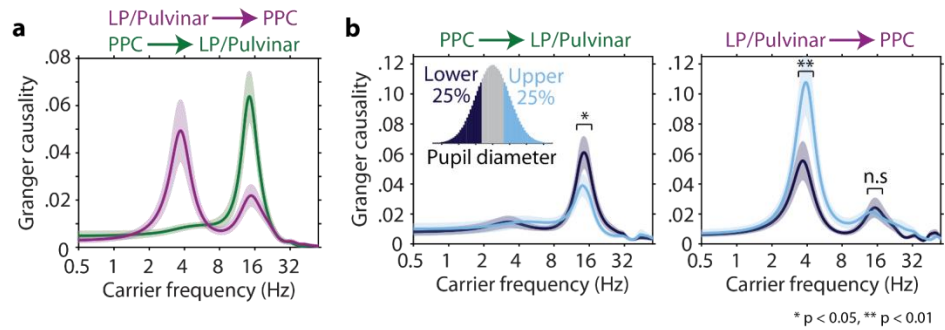

846

847

848 **Figure 4 / Arousal level determines the direction and carrier frequency of thalamo-cortical**

849 **causal interaction. a**, Spectrally resolved Granger causality shows the carrier frequencies of

850 directed interaction from LP/Pulvinar to PPC (magenta), and PPC to LP/Pulvinar (green,  $\pm$  SEM).

851 LP/Pulvinar has a causal influence on PPC in the theta and alpha frequency bands. In the opposing

852 direction, PPC has a causal influence on LP/Pulvinar in the alpha band. **b**, Granger causality was

853 measured for time periods where the pupil diameter was small ( $<$  25%, dark blue), and large ( $>$

854 25%, light blue), respectively. Data were subsampled to match power distributions between

855 conditions. The causal influence of PPC alpha oscillations on LP/Pulvinar was significantly

856 stronger during small pupil diameter epochs (left plot,  $P = 0.018$  t-test). In contrast, the causal

857 influence of LP/Pulvinar theta oscillations on PPC was significantly greater during large pupil

858 diameter epochs (right plot,  $P = 0.0015$  t-test).

859

860

861

862

863

864

865

866

867

868

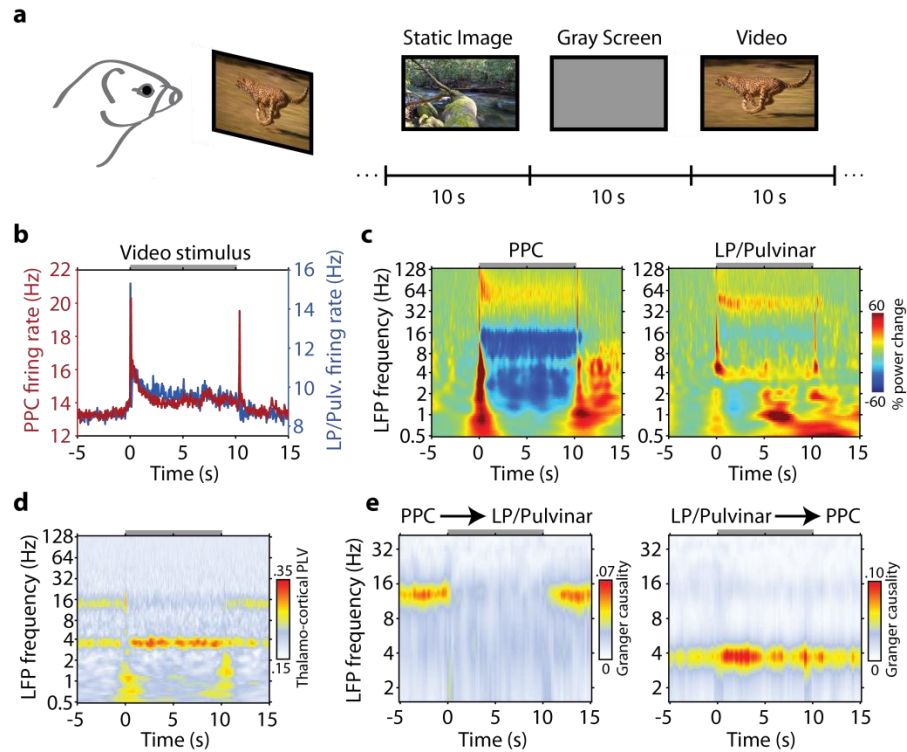

869

870

871 **Figure 5 / Visual processing induced changes in thalamo-cortical network dynamics. a,**

872 Animals passively viewed a collection of naturalistic images or videos. During the inter stimulus

873 interval a gray screen was presented. **b,** Population mean spike rate in PPC and LP/Pulvinar during

874 presentation of video stimuli. The gray bar at the top of the plot indicates the duration of

875 stimulation. **c,** Population LFP spectrograms from PPC (left) and LP/Pulvinar (right) during

876 presentation of naturalistic videos. LFP power was normalized to the period -5 to -1 seconds before

877 stimulus onset. Note the decrease in alpha oscillatory power in PPC during stimulus presentation.

878 **d,** Across session average thalamo-cortical phase synchronization in response to naturalistic video

879 stimuli. PLV in the theta band is elevated during stimulus presentation, while alpha PLV is weaker.

880 **e,** Time and frequency resolved Granger causality analysis computed between PPC and

881 LP/Pulvinar LFP signals for naturalistic video stimuli. The onset of video stimuli leads to a

882 breakdown of PPC causal influence on LP/Pulvinar in the alpha band (left plot), and an increase

883 of LP/Pulvinar causal influence on PPC in the theta frequency band (right plot).

884

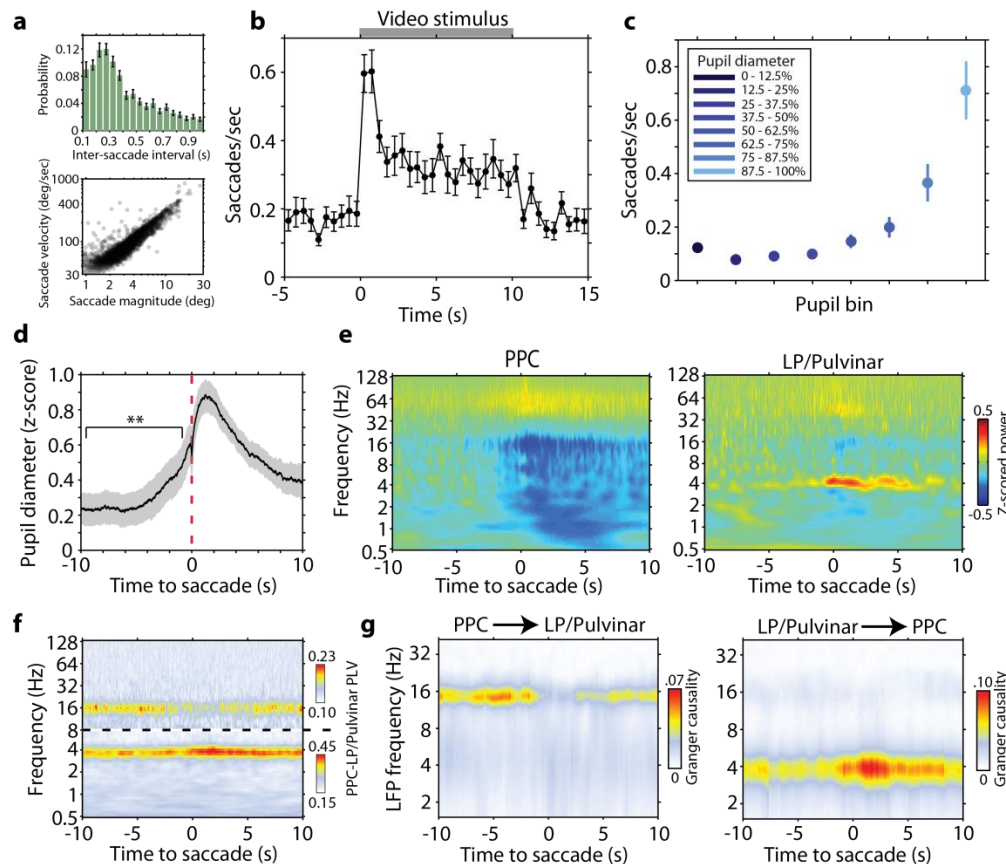

885

886 **Figure 6 / Saccades link visual sensory processing and pupil-linked arousal related changes**

887 **in thalamo-cortical dynamics.** **a**, Distribution of inter saccade interval (top,  $\pm$  SEM) shows that

888 ferrets actively sample the visual environment rhythmically. The relationship between saccade

889 magnitude and peak velocity (bottom) reflects the ballistic nature of saccades in ferrets. **b**, Saccade

890 rate during naturalistic video presentation illustrates that animals actively sample visual stimuli by

891 showing an elevated rate of saccades ( $n = 26$  sessions). **c**, Saccade rate as a function of pupil

892 diameter in the dark. The rate of saccades during large pupil diameter states is comparable to the

893 rate of saccades when animals are actively sampling naturalistic videos. **d**, Mean ( $\pm$  SEM)

894 fluctuations in pupil diameter time locked to saccadic eye movements in the dark. Transient

895 increases in pupil diameter precede saccades ( $P = 0.004$ , t-test). **e**, Population average LFP power

896 spectrograms in PPC (left) and LP/Pulvinar (right) time locked to saccades in the dark. LFP power

897 was z-score normalized across the entire recording session. **f**, Population average PPC to

898 LP/Pulvinar PLV time locked to saccades in the dark. Dotted line indicates a break in the color

899 scale, as shown to the right of the figure. **g**, Across session average time and frequency resolved

900 Granger causality between PPC and LP/Pulvinar around the occurrence of saccades in the dark.

901 Active sampling by saccades was associated with a decrease in PPC causal influence on  
902 LP/Pulvinar in the alpha band and an increase in LP/Pulvinar on PPC in the theta band.

903

904

905

906

907

908

909

910

911

912

913

914

915

916

917

918

919

920

921

922

923

924

925

926

927

928

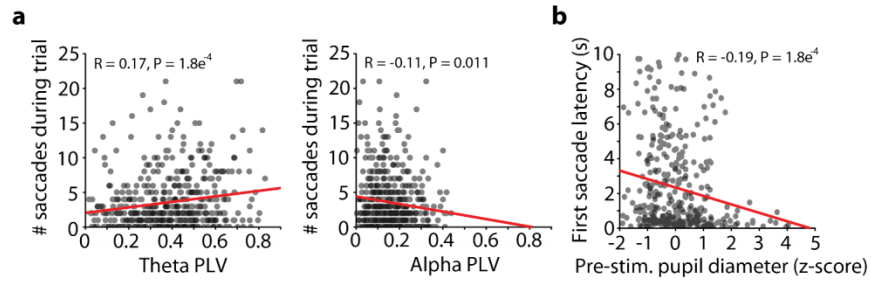

929

930

931 **Figure 7 / Thalamo-cortical synchronization and pupil-linked arousal correlate with saccade**

932 **behavior. a**, Correlation of thalamo-cortical phase synchronization in the theta (left) and alpha

933 (right) carrier frequency bands and the number of saccades performed during presentation of

934 naturalistic video stimuli. Theta PLV displays a significant positive correlation with saccadic

935 sampling of stimuli, whereas alpha PLV displays a significant negative correlation. **b**, Correlation

936 of pre-stimulus pupil diameter to the latency of the first saccade for subsequent naturalistic video

937 stimulus presentation. Significant negative correlation illustrates that animals react by visually

938 sampling stimuli more rapidly when they are in a more aroused state.

939

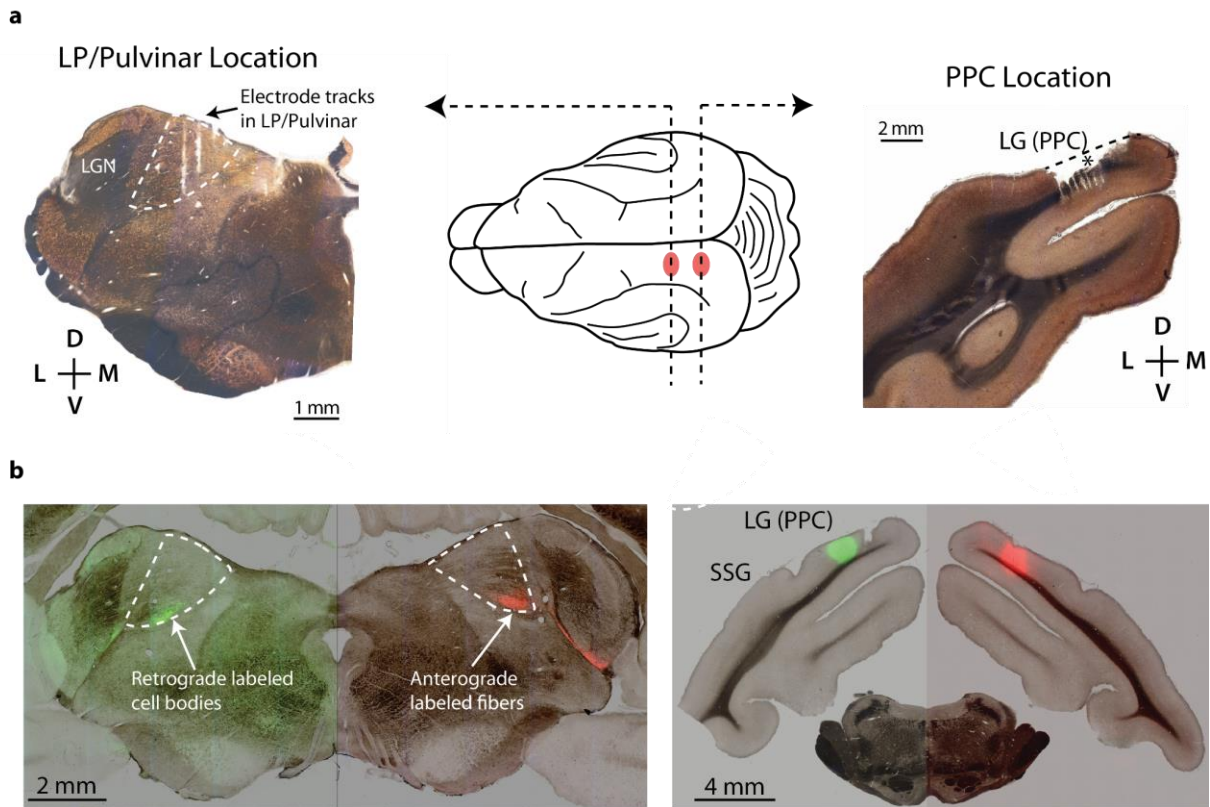

940

941 **Supplementary Figure 1 / Histological confirmation of multielectrode array recording sites**  
942 **in anatomically connected sites of PPC and LP/Pulvinar.**

943 **a**, Coronal sections of LP/Pulvinar (left) and PPC (right) stained for cytochrome oxidase were used  
944 for verifying the location of multielectrode array recording sites. The middle panel shows a  
945 schematic representation of the ferret brain, with the approximate location of LP/Pulvinar and PPC  
946 electrode implantation shown in red. Left: A representative section showing electrode tracks and  
947 recording site in the LP/Pulvinar. Right: A representative section showing the recording site of a  
948 PPC microelectrode array. The location of the electrode implantation is illustrated by the damage  
949 induced from removing the microelectrode array (indicated by \*). **b**, The location of LP/Pulvinar  
950 and PPC microelectrode implantation overlapped with patterns of anatomical connectivity outlined  
951 in previous tracing experiments, indicating that electrophysiological data were obtained from  
952 reciprocally connected regions of thalamus and cortex. Abbreviations: LG (lateral gyrus), SSG  
953 (suprasylvian gyrus).

954

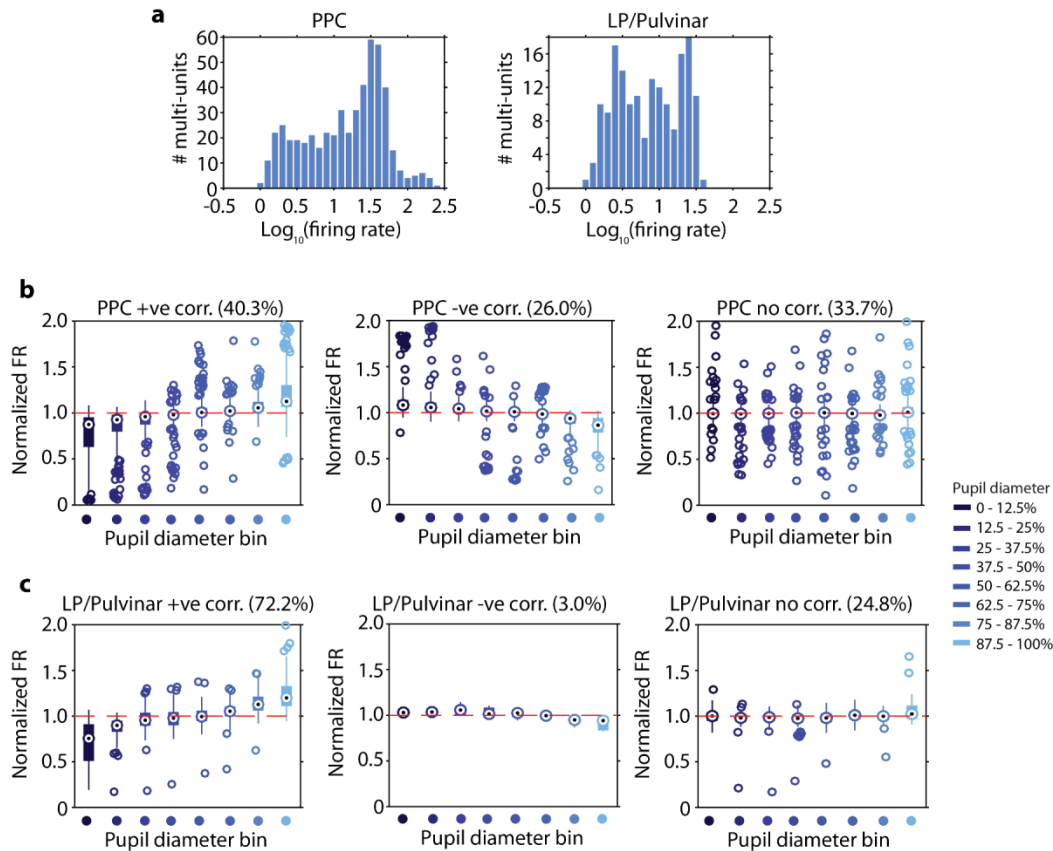

955

956

957 **Supplementary Figure 2 / Pupil-linked arousal dependent changes in PPC and LP/Pulvinal**

958 **firing rate.** **a**, Distribution of multi-unit firing rates in PPC (n = 519) and LP/Pulvinal (n = 169).

959 **b**, Population box plots of PPC firing rate across each pupil diameter bin. PPC multi-units were

960 sorted into three populations; units that significantly increased firing rate with increasing pupil

961 diameter (40.3% of units), units that significantly decreased firing rate with increasing pupil

962 diameter (26.0% of units), and units where there was no relationship between firing rate and pupil

963 diameter (33.7% of units). **c**, The same analysis as **b** performed for LP/Pulvinal multi-unit spiking

964 activity. In contrast to PPC, where units displayed both increases and decreases in firing rate with

965 pupil-linked arousal, the vast majority of multi units in LP/Pulvinal (72.2%) displayed

966 significantly increased firing rate with increasing pupil diameter. In addition, very few (3.0%) units

967 displayed a decrease in firing rate with pupil-linked arousal.

968

969

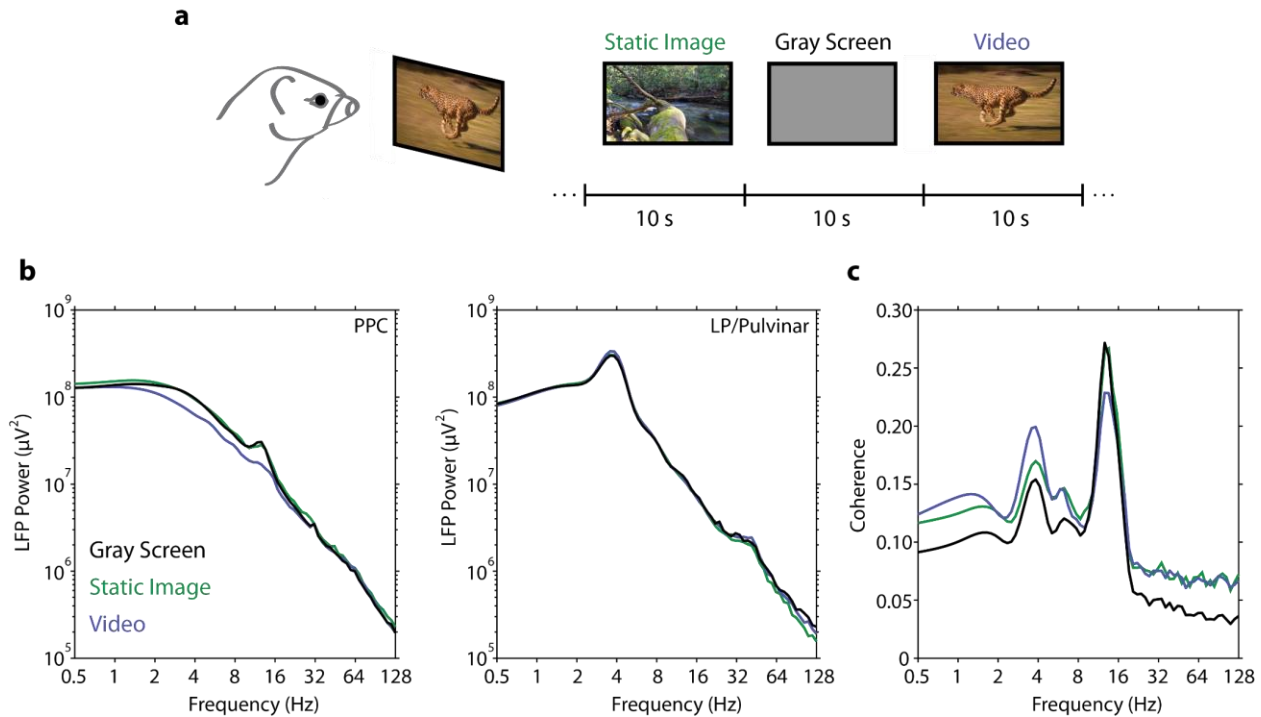

970

971

972 **Supplementary Figure 3 / PPC and LP/Pulvinar LFP power spectra under different visual**  
973 **stimulus conditions. a**, Animals were presented with a library of static images and videos that  
974 were randomly interleaved. During the inter-stimulus interval a gray screen was presented. **b**, The  
975 mean LFP power spectrum in PPC and LP/Pulvinar for the different stimulus conditions. Note the  
976 presence of a prominent peak in the power spectrum at around 12-17 Hz in PPC, which was  
977 strongest in the gray screen and static images conditions. LP/Pulvinar LFP spectra were marked  
978 by a large peak in the theta frequency band (3.3-4.5 Hz). **c**, The coherence spectrum between co-  
979 recorded signals in PPC and LP/Pulvinar. Note the peak in coherence in the 12-17 Hz frequency  
980 band that reduces in magnitude for the video condition. Given that LFP signal power and thalamo-  
981 cortical coherence in this frequency range was reduced following visual stimulation, we interpreted  
982 the frequency band centered around 14Hz to reflect the endogenous alpha frequency in the ferret.  
983 This is in line with a mechanistic definition of the alpha rhythm as a thalamo-cortically generated  
984 oscillation that reduces in amplitude when networks are engaged in processing sensory  
985 information.

986

987



988

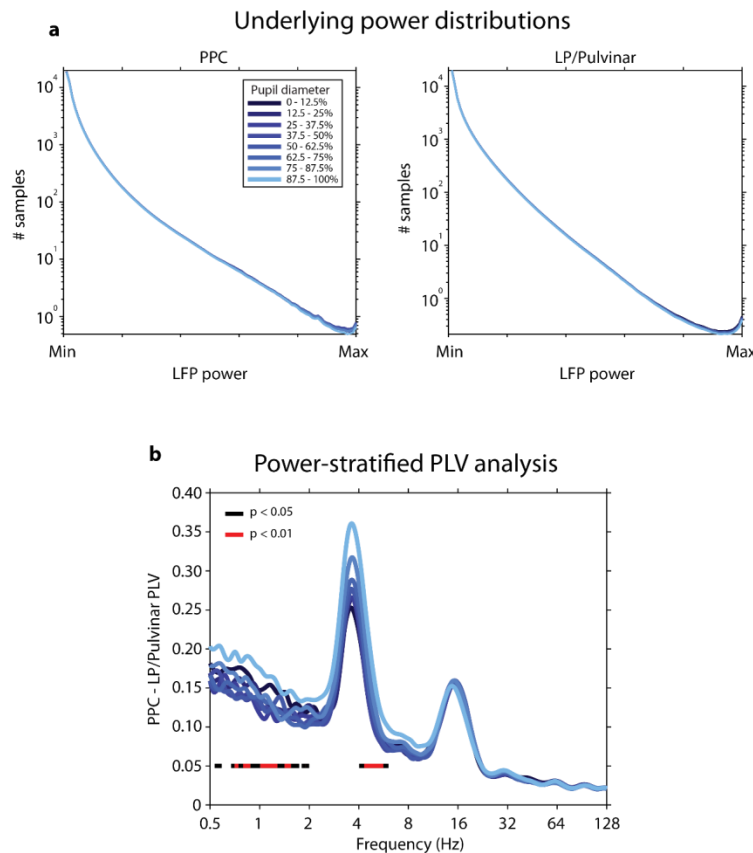

989

990

991 **Supplementary Figure 4 / Thalamo-cortical phase synchronization with matched power**  
992 **distributions.** **a**, LFP data were subsampled within each frequency band to match the power  
993 distributions across all pupil diameter bins. **b**, Thalamo-cortical phase synchronization based on  
994 LFP data that were matched for power across pupil diameter bins. The color bars below PLV plots  
995 illustrate frequency bands that display a significant effect of pupil diameter (one-way ANOVA,  
996 FDR corrected P values). PLV in the theta frequency band remains significant after subsampling  
997 data to match power values across conditions. Power matched PLV analysis in the alpha band  
998 shows no significant change across pupil diameter bins. However, this result is in contrast to  
999 thalamo-cortical spike-spike correlation analysis, which displays a clear effect in the alpha band  
1000 (Supplementary Figure 5). Given that spike correlations more closely reflect the physiological  
1001 processes underlying thalamo-cortical functional interaction, we argue that the lack of significant  
1002 modulation of PLV across pupil diameter bins in the alpha band is an artifact of the power  
1003 matching procedure.

1004

1005

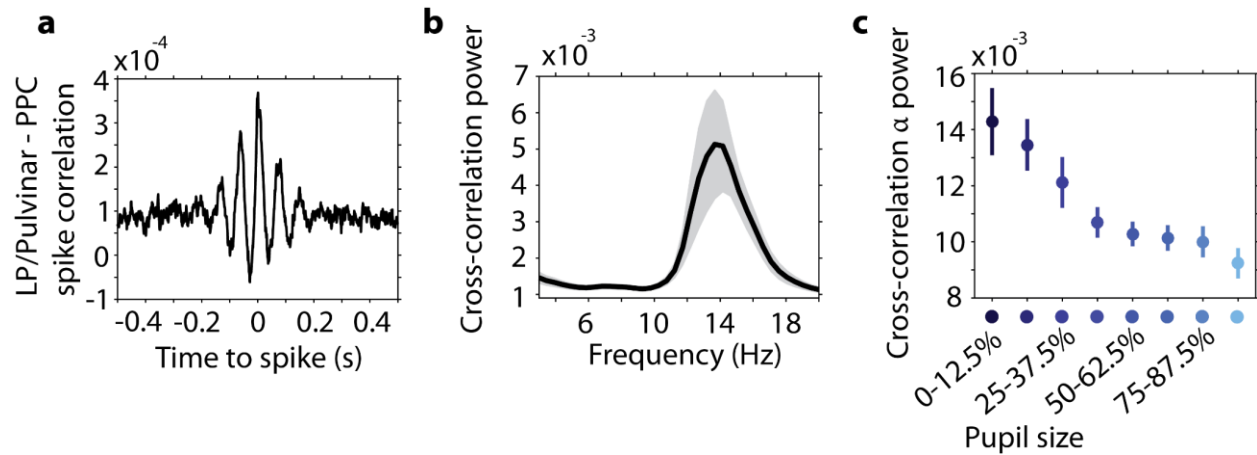

1006

1007 **Supplementary Figure 5 / Thalamo-cortical spike correlation as a function of pupil diameter.**

1008 **a**, Population average spike cross-correlation measured between LP/Pulvinar and PPC recording  
1009 sites. Note the synchronous oscillatory structure occurring within the alpha frequency band (period  
1010 of 68 ms  $\sim$ 14.7 Hz). **b**, The mean power spectrum ( $\pm$  SEM) of thalamo-cortical spike cross-  
1011 correlation displays a prominent peak in the alpha band. **c**, Alpha oscillatory power in thalamo-  
1012 cortical spike cross correlation significantly decreased with pupil dilation ( $P = 4.1^{-6}$  one-way  
1013 ANOVA,  $r = -0.42$ ).

1014

1015

1016

1017

1018

1019

1020

1021

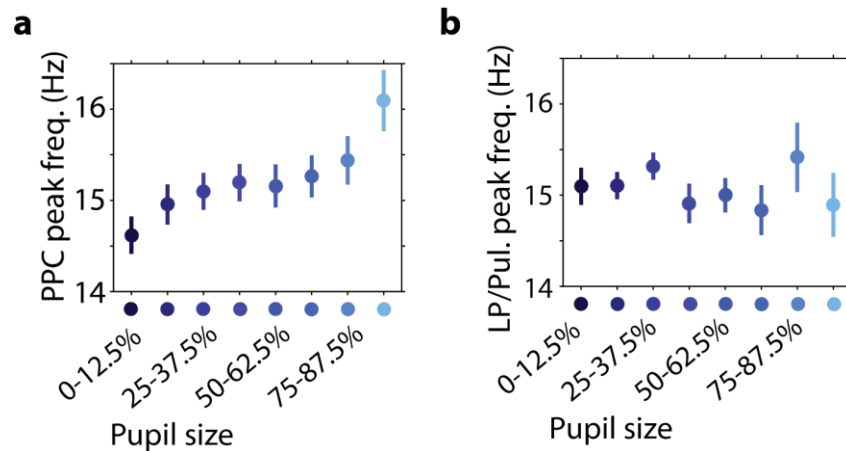

1022

1023

1024 **Supplementary Figure 6 / Endogenous alpha frequency speeds up in cortex with arousal. a-**

1025 **b**, Alpha frequency was measured by taking the peak of spike-LFP phase synchronization spectra

1026 within PPC (a), and LP/Pulvinar (b). Note that peak alpha frequency speeds up in PPC with

1027 increasing pupil diameter ( $P = 0.003$  one-way ANOVA). In contrast, peak alpha frequency in

1028 LP/Pulvinar displays no relationship to changes in pupil size ( $P = 0.85$  one-way ANOVA).

1029

1030

1031

1032

1033

1034

1035

1036

1037

1038

1039

1040

1041

1042

1043

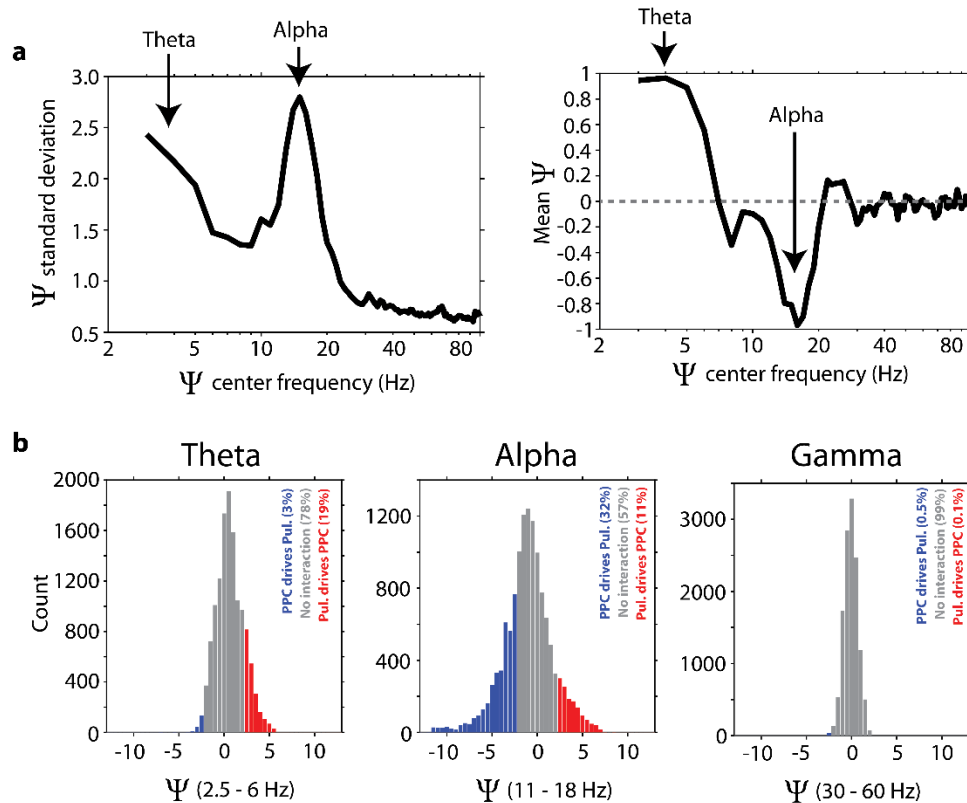

1044

1045

1046 **Supplementary Figure 7 / Phase slope index ( $\Psi$ ) uncovers reciprocal thalamo-cortical**  
1047 **effective connectivity in the theta and alpha frequency bands. a**, The mean and standard  
1048 deviation of population level phase slope index (PSI) analyses. PSI was initially computed on  
1049 LP/Pulvinar and PPC LFP signals in a 4 Hz sliding window in the frequency domain (1-100 Hz in  
1050 1 Hz steps). We observed both significant drivers and receivers in each recording, with values  
1051 greater than 2 indicating that LP/Pulvinar significantly drives PPC, and values lower than -2  
1052 indicating that PPC significantly drives LP/Pulvinar ( $p < 0.05$ ). The standard deviation of PSI  
1053 values was therefore used to infer the width of the PSI distribution, or the extent to which each  
1054 carrier frequency displays significant drivers or receivers. At the same time the mean indicates if  
1055 thalamo-cortical (positive PSI values) or cortico-thalamic (negative PSI values) effective  
1056 connectivity dominates population level PSI analyses. We observed the largest PSI standard  
1057 deviation in the theta and alpha frequency bands, indicating these are the carrier frequency bands  
1058 of thalamo-cortical effective connectivity. The mean of the PSI distribution shifted from positive  
1059 in the theta band to negative in the alpha band, with all other frequencies converging on zero.

1060 Together, these results indicate there is generally greater effective connectivity in the theta and  
1061 alpha bands, but that these frequency bands reflect effective connectivity in opposing directions,  
1062 with theta band effective connectivity indicating LP/Pulvinar drives PPC, and alpha band effective  
1063 connectivity indicating PPC drives LP/Pulvinar. **b**, Population level PSI analysis computed on all  
1064 channel pairs for the theta (2.5-6 Hz), alpha (11-18 Hz), and gamma (30-60 Hz) frequency bands.  
1065 In each histogram, red bars indicate the proportion of channel pairs where LP/Pulvinar  
1066 significantly drives PPC, gray bars indicate no significant interaction, and blue bars indicate where  
1067 PPC significantly drives LP/Pulvinar. The percentage of total channel pairs for each sub-group are  
1068 given as insets in each figure. Note that theta and alpha PSI values show wider distributions, and  
1069 that the center of mass is shifted away from zero. In contrast, gamma PSI values are closely  
1070 centered around zero, indicating this frequency range does not mediate thalamo-cortical effective  
1071 connectivity.

1072

1073

1074

1075

1076

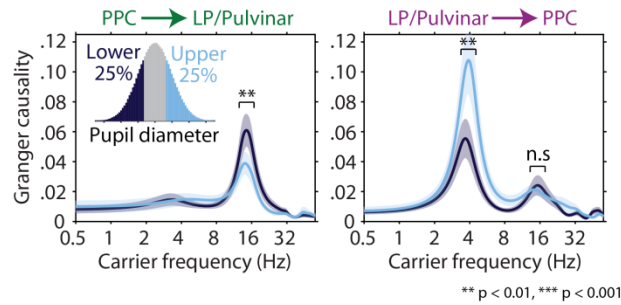

### Power distributions

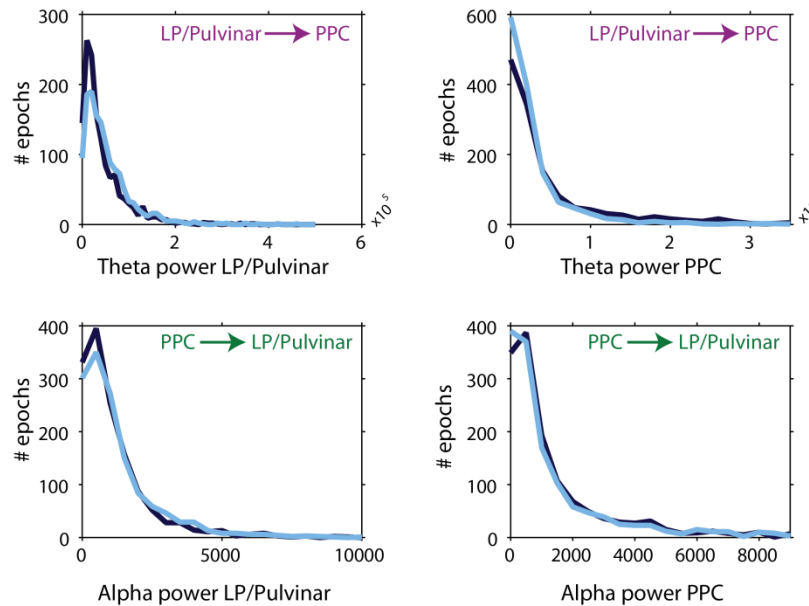

1077

1078

1079 **Supplementary Figure 8 / Power matched Granger causality analysis.** Granger causality was  
1080 measured for time periods where the pupil diameter was small (< 25%, dark blue), and large (>  
1081 25%, light blue), respectively. Data were subsampled to match power distributions for the theta  
1082 and alpha frequency bands between conditions. Given that the theta band was the main carrier  
1083 frequency of thalamus-to-cortex effective connectivity, we matched power distributions in the  
1084 theta band while computing LP/Pulvinal to PPC Granger causality. Similarly, since alpha was the  
1085 predominant carrier frequency of cortex-to-thalamus effective connectivity, we matched power  
1086 distributions in the alpha band while computing PPCto LP/Pulvinal Granger causality. The power  
1087 distributions of data that were used for Granger causality estimation are shown in the lower four  
1088 plots.

1089

1090

1091

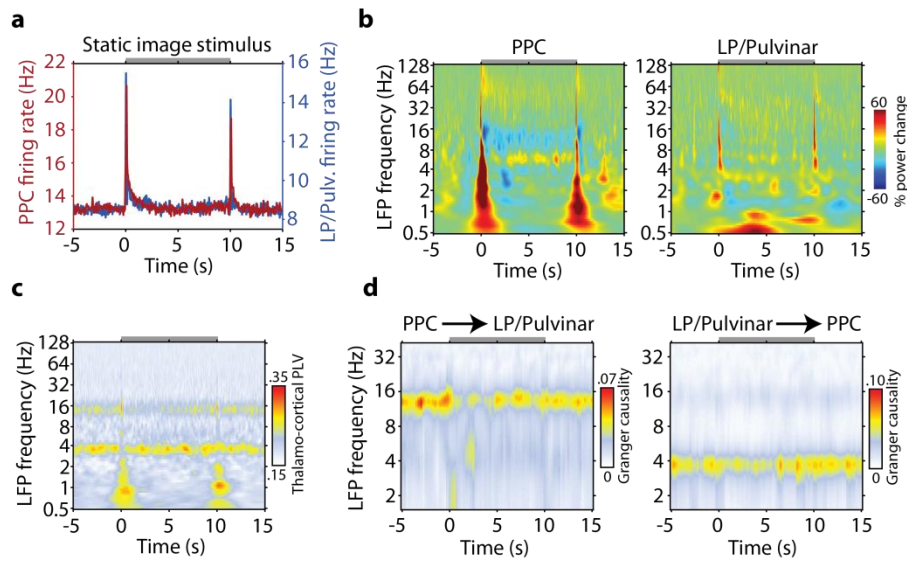

1092

1093

1094 **Supplementary Figure 9 / PPC and LP/Pulvinal responses to naturalistic images. a,** Across

1095 session average firing rate during presentation of naturalistic images. **b,** Across session average

1096 LFP spectrogram for PPC (left) and LP/Pulvinal (right) in response to naturalistic images. LFP

1097 power was normalized by the prestimulus power (-5 to -1 seconds). **c,** Average thalamo-cortical

1098 PLV during the time course of naturalistic image presentation. **d,** Average time and spectral

1099 resolved Granger causality analysis for naturalistic image presentation. The gray bar at the top of

1100 each plot indicates the duration of naturalistic image presentation.

1101

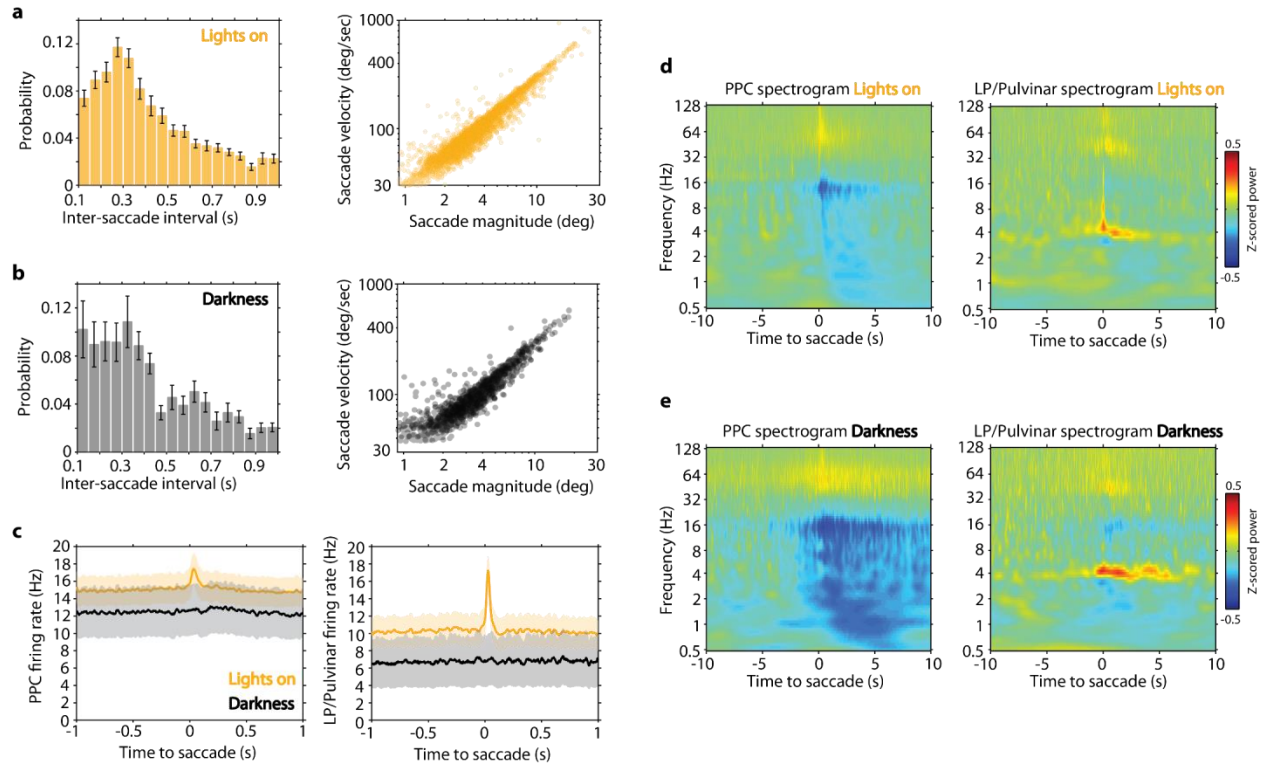

1102

1103

1104 **Supplementary Figure 10 / Basic saccade properties and saccade-locked measures of spiking**

1105 **activity and LFP power. a-b,** Inter saccade interval ( $\pm$  SEM) and scatter plot of saccade

1106 magnitude versus peak velocity for saccades performed with the lights on (**a**) and in a dark room

1107 (**b**). **c,** Across session average firing rate in PPC (left) and LP/Pulvinar (right) time locked to the

1108 occurrence of saccades in the light and dark (shaded regions indicate  $\pm$  SEM). Saccade-locked

1109 increases in firing rate in PPC and LP/Pulvinar are only present when the lights are on, suggesting

1110 that these responses depend on visual input. **d-e,** Across session average LFP spectrograms

1111 computed around the occurrence of saccades with the lights on (**d**) and in a dark room (**e**). LFP

1112 power was z-score normalized within each frequency band across the entire recording session. In

1113 contrast to the fast modulation of spiking activity during saccades, LFP power spectra in both

1114 lights on and lights off conditions reflect slower fluctuations in PPC alpha and LP/Pulvinar theta

1115 rhythms.

1116

1117



1118

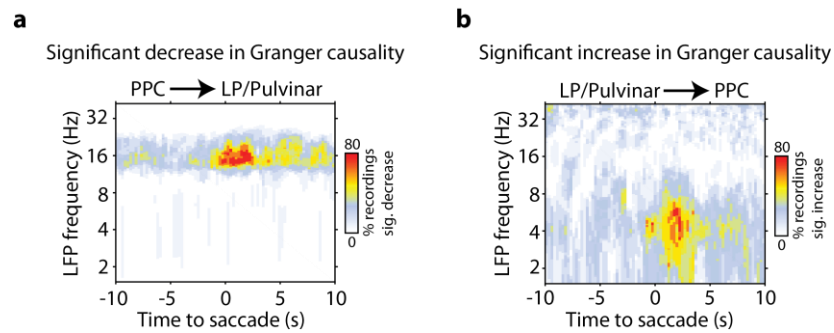

1119

1120

1121 **Supplementary Figure 11 / Significant modulation of cortico-thalamic and thalamo-cortical**

1122 **Granger causality time locked to saccades in the dark. a**, Percent of recording sessions that

1123 displayed significant ( $p < 0.05$ ) reduction in PPC to LP/Pulvinar Granger causality, resolved for

1124 frequency and time around the occurrence of saccades. **b**, The same analysis as **a**, but for

1125 significant increase in LP/Pulvinar causal influence on PPC. In each case, significance was

1126 estimated by computing Granger causality at random time points during each recording, where

1127 significant time and frequency points were those that deviated 2 standard deviations from the mean

1128 of randomly computed Granger causality estimates. These plots show that the causal influence of

1129 cortical alpha rhythms on thalamus breaks down as animals begin to actively sample the visual

1130 environment with saccades. Conversely, thalamic causal influence on cortex in the theta band

1131 increases predominantly after animals begin to saccade.

1132

1133

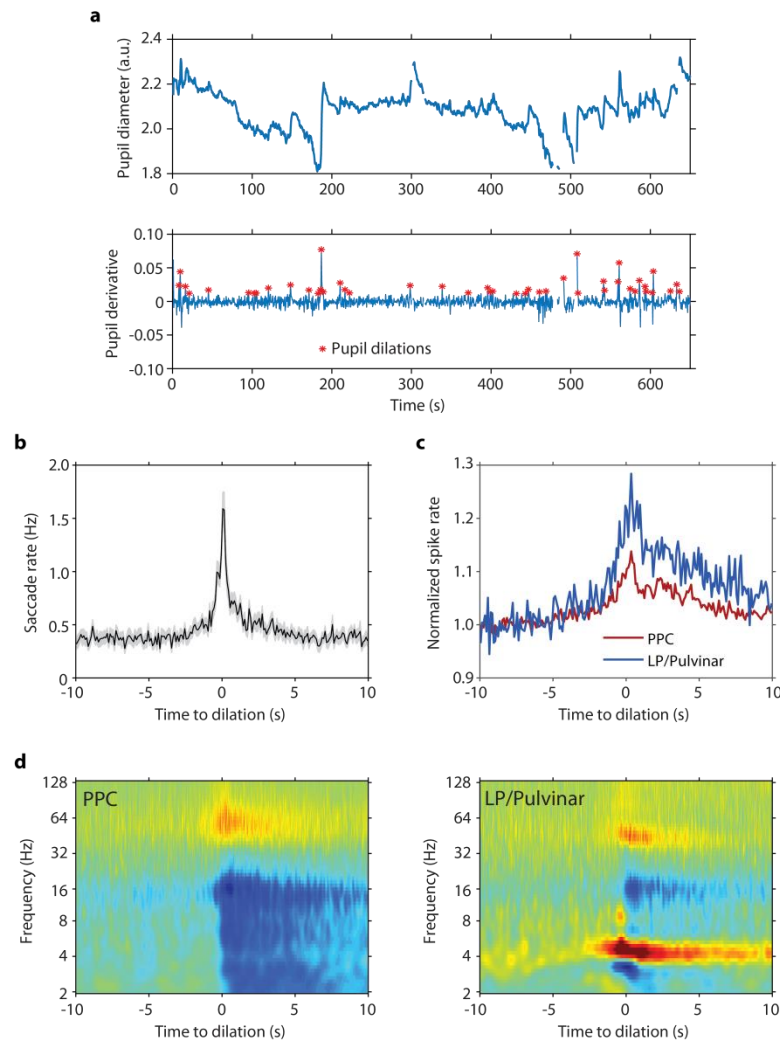

1134

1135 **Supplementary Figure 12 / Transient pupil dilations lead to the reorganization of oculomotor**  
1136 **behavior and neural activity in PPC and LP/Pulvinar. a**, Pupil diameter (top) and pupil  
1137 diameter first derivative (bottom) for one example recording. Transient pupil dilations were  
1138 detected by finding local peaks in pupil diameter derivative time series. Discontinuities in plots  
1139 indicate where data have been removed around the occurrence of large-amplitude saccades or eye-  
1140 blinks. **b**, Mean saccade rate ( $\pm$  SEM) time locked to the occurrence of pupil dilations. **c**, Average  
1141 multiunit spike rate in PPC and LP/Pulvinar time locked to pupil dilations. **d**, LFP power  
1142 spectrograms in PPC (left) and LP/Pulvinar (right) time locked to pupil dilations. LFP power was  
1143 z-score normalized across the entire recording session.

1144

1145

1146

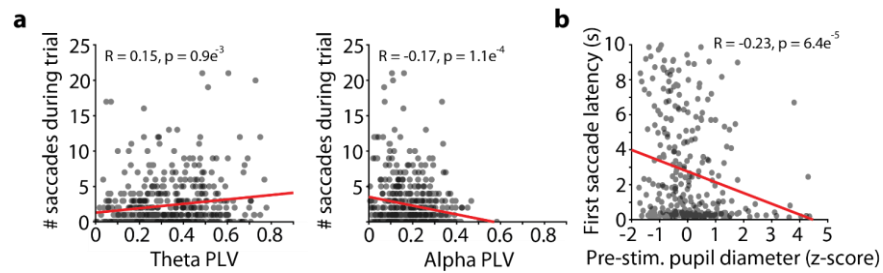

1149 **Supplementary Figure 13 / Correlation of thalamo-cortical functional connectivity and**  
1150 **prestimulus pupil diameter to oculomotor behavior while viewing naturalistic images. a,**  
1151 Correlation of thalamo-cortical phase synchronization in the theta (left) and alpha (right) carrier  
1152 frequency bands and the number of saccades performed during presentation of naturalistic images.  
1153 Theta PLV displays a significant positive correlation with saccadic sampling of stimuli, whereas  
1154 alpha PLV displays a significant negative correlation. **b,** Correlation of pre-stimulus pupil diameter  
1155 to the latency of the first saccade for subsequent naturalistic image stimulus presentation.  
1156 Significant negative correlation illustrates that animals sample incoming visual stimuli more  
1157 rapidly when they are in a more aroused state.

1158

1159

1160
